1 **Transcription factor paralogs orchestrate alternative gene regulatory**  
2 **networks by context-dependent cooperation with multiple cofactors**

3

4 Siqian Feng<sup>1,2</sup>, Chaitanya Rastogi<sup>4</sup>, Ryan E. Loker<sup>1,2,3</sup>, William J. Glassford<sup>1,2</sup>, H. Tomas  
5 Rube<sup>4,6</sup>, Harmen J. Bussemaker<sup>4,5</sup>, and Richard S. Mann<sup>1,2,5,\*</sup>

6 <sup>1</sup>Department of Biochemistry and Molecular Biophysics

7 <sup>2</sup>Mortimer B. Zuckerman Mind Brain Behavior Institute

8 <sup>3</sup>Department of Genetics and Development

9 <sup>4</sup>Department of Biological Sciences

10 <sup>5</sup>Department of Systems Biology

11 Columbia University, New York, New York, USA

12 <sup>6</sup>Present address: Department of Bioengineering, University of California, Merced,  
13 California, USA

14 \*Correspondence: [rsm10@columbia.edu](mailto:rsm10@columbia.edu) (R.S.M.)

15

16

17

18

19

20

21

22

23

24

25

## 26 **Abstract**

27 In eukaryotes, members of large transcription factor families often exhibit similar DNA  
28 binding properties *in vitro*, yet initiate paralog-specific gene regulatory networks *in vivo*.  
29 The serially homologous first (T1) and third (T3) thoracic legs of *Drosophila*, which  
30 result from alternative gene regulatory networks specified by the Hox proteins Scr and  
31 Ubx, respectively, offer a unique opportunity to address this paradox *in vivo*. Genome-  
32 wide analyses using epitope-tagged alleles of both Hox loci in the T1 and T3 leg  
33 imaginal discs, which are the precursors to the adult appendages and ventral body  
34 regions, show that ~8% of Hox binding is paralog-specific. Binding specificity is  
35 mediated by interactions with distinct cofactors in different domains: the known Hox  
36 cofactor Exd acts in the proximal domain and is necessary for Scr to bind many of its  
37 paralog-specific targets, while in the distal leg domain, we identified the homeodomain  
38 protein Distal-less (Dll) as a novel Hox cofactor that enhances Scr binding to a different  
39 subset of genomic loci. Reporter genes confirm the *in vivo* roles of Scr+Dll and suggest  
40 that ~1/3 of paralog-specific Hox binding in enhancers is functional. Together, these  
41 findings provide a genome-wide view of how Hox paralogs, and perhaps paralogs of  
42 other transcription factor families, orchestrate alternative downstream gene networks  
43 and suggest the importance of multiple, context-specific cofactors.

44

## 45 **Main**

46 Serial homology refers to animal body parts that are recognizably similar to each  
47 other, yet have distinct morphological characteristics that are optimized for carrying out  
48 specialized functions<sup>1</sup>. The forelimbs and hindlimbs of tetrapod animals and the wings  
49 and halteres of dipteran insects are both examples of serially homologous appendages  
50 within an organism. The concept of homology is also useful for comparing structures  
51 between species, such as the hindlegs of a kangaroo versus the hindlegs of a horse. In  
52 these examples, evolutionary forces sculpted morphological differences between these  
53 appendages to optimize their functions in each species. For both types of morphological  
54 variation, the homeodomain transcription factors encoded by the Hox genes, together

55 with the gene regulatory networks they control, play a central role. To diversify  
56 structures within an organism, Hox genes have duplicated, allowing them to alter their  
57 activities and expression domains, thus facilitating morphological modifications to  
58 appendages and other body parts<sup>2</sup>. Analogously, on an evolutionary time scale, the  
59 modifications of Hox gene networks have played a central role in generating the vast  
60 diversity of animal morphologies in biology that exist today<sup>3,4</sup>.

61 Although changes in Hox gene networks are a major driving force in animal  
62 morphological diversity, the underlying mechanisms are not well understood. For  
63 instance, for any pair of homologous structures, we are largely ignorant about how  
64 many and what types of changes to Hox gene regulatory networks are required to  
65 modify morphologies, and how many are directly controlled by Hox transcription factors.  
66 Second, as transcription factors, all Hox paralogs have very similar DNA binding  
67 homeodomains and binding specificities, raising the fundamental question of how  
68 different Hox paralogs execute distinct, yet related, gene regulatory networks in  
69 homologous body parts<sup>5-7</sup>. One answer to this question is that DNA binding cofactors, in  
70 particular Extradenticle (Exd) in *Drosophila* and Pbx in vertebrates, reveal novel latent  
71 DNA binding specificities upon heterodimerization with Hox factors<sup>8</sup>. However, these  
72 cofactors are only available in a subset of Hox-expressing domains, implying that there  
73 are additional cofactors and/or non-DNA binding mechanisms that are used to  
74 discriminate between Hox functions in serially homologous structures.

75 In this study, we address these and related questions in the context of a classic  
76 example of serial homology, namely, how two *Drosophila* Hox proteins – Sex combs  
77 reduced (Scr) and Ultrabithorax (Ubx) – achieve their paralog-specific functions to  
78 specify distinct leg morphologies in the first (T1) and third (T3) thoracic segments,  
79 respectively. Although the transcriptomes of the larval precursors of the legs are very  
80 similar, a comparison between the chromatin immunoprecipitation followed by deep  
81 sequencing (ChIP-seq) profiles of Scr and Ubx revealed that ~8% of binding by these  
82 Hox proteins is paralog-specific, suggesting that the different leg morphologies are  
83 initiated at least in part by differences in Hox binding to a small set of enhancers.  
84 Further, we show that differential chromatin accessibility or Scr and Ubx monomer

85 binding specificities are not sufficient to account for paralog-specific binding. On the  
86 other hand, comparing the ChIP-seq profiles between wild type and a mutated Scr that  
87 is unable to heterodimerize with Exd revealed that many, but not all Scr-specific binding  
88 events are Exd-dependent. We further identified the homeodomain protein Distal-less  
89 (Dll) as a novel Scr cofactor capable of enhancing Scr-DNA binding in cells where Exd  
90 is not available. Reporter gene assays support the idea that Dll, as well as additional  
91 cofactors, contribute to Scr's specific activities in the T1 leg. Overall, using a  
92 combination of whole genome and mechanistic approaches, we demonstrate that to  
93 generate distinct morphologies in serially homologous body parts, Hox proteins depend  
94 on multiple, region-specific DNA binding cofactors to directly modify gene regulatory  
95 networks.

96

## 97 **Results**

### 98 **Paralog-specific Hox expression and function in developing *Drosophila* legs**

99 In *Drosophila*, the adult legs and ventral body wall develop from larval tissues  
100 called leg imaginal discs. While the three pairs of legs — each present in the thoracic  
101 (T) segments T1, T2 and T3 — have similar overall structures, they also have  
102 characteristic morphological differences unique to each leg pair<sup>9,10</sup> (Fig. 1a). These  
103 morphological differences are Hox-dependent, with Scr dictating T1 leg characteristics  
104 and Ubx dictating T3 leg characteristics<sup>11</sup>. Consistently, Scr is expressed in T1, but not  
105 T3, and Ubx is expressed in T3, but not T1, leg imaginal discs, the larval precursors of  
106 the adult appendages (Fig. 1b). Removing Scr function from a developing T1 leg or Ubx  
107 function from a developing T3 leg results in the homeotic transformation to a T2 leg fate  
108 (Fig. 1c)<sup>11,12</sup>. Consequently, all differences between T1 and T3 legs can be attributed  
109 either directly or indirectly to Scr and Ubx functions. Thus, the developing T1 and T3  
110 legs provide a natural setting to compare Scr and Ubx functions in serially homologous  
111 tissues *in vivo* without the need for analyzing mutants.

112 To leverage this system under physiological conditions, we first compared the  
113 global transcriptomes of the T1 and T3 leg imaginal discs. Not surprisingly, these

114 profiles are very similar to each other, with only a handful of genes, including *Scr* and  
115 *Ubx*, showing more than a two-fold difference in expression levels (Fig. 1d, Extended  
116 Data Fig. 1 and Supplementary Table 1). Next, genome editing was used to insert a  
117 3xFLAG epitope tag at the endogenous *Scr* and *Ubx* loci (Fig. 1e), allowing us to use  
118 the same anti-FLAG antibody to obtain genome-wide binding data for both Hox paralogs  
119 (see Methods, Extended Data Fig. 2 and ref<sup>13</sup>). Multiple verified alleles for both  
120 genotypes (*3xFLAG-Scr* and *3xFLAG-Ubx*) were homozygous viable and fertile, and did  
121 not show any noticeable developmental delays or defects.

122

### 123 **Genome-wide identification of paralog-specific and shared Hox binding events**

124 To determine if and to what extent paralog-specific Hox-DNA binding contributes  
125 to *Scr*- and *Ubx*-specific gene networks in the legs, CHIP-seq experiments against the  
126 3xFLAG tag were performed from T1 and T3 leg imaginal discs dissected from *3xFLAG-*  
127 *Scr* and *3xFLAG-Ubx* lines, respectively, both isogenized into the same *w<sup>1118</sup>* genetic  
128 background. As a negative control, 3xFLAG CHIP-seq experiments were also performed  
129 using T1 leg discs from isogenic *w<sup>1118</sup>* flies with no FLAG epitope. Thousands of DNA  
130 binding events were identified from both 3xFLAG tagged *Hox* lines, whereas fewer than  
131 20 were detected from T1 leg discs from the isogenic *w<sup>1118</sup>* line (Fig. 1f). Examples of  
132 loci showing both similar and differential *Scr* binding in T1 and *Ubx* binding in T3 could  
133 be readily identified (Fig. 1f). For both *3xFLAG-Scr* and *3xFLAG-Ubx*, ~45% of loci were  
134 located in intergenic or intronic regions, consistent with binding to *cis*-regulatory  
135 modules (CRMs)<sup>14,15</sup> (Fig. 1g). Importantly, *de novo* motif searches identified Hox-Exd  
136 motifs that were remarkably consistent with those preferred by *Scr*-Exd and *Ubx*-Exd *in*  
137 *vitro* (Fig. 1h and Extended Data Fig. 3a)<sup>8</sup>.

138 Genome-wide differential binding analysis was then performed to compare *Scr*  
139 bound loci in T1 leg discs (referred to as *Scr<sub>T1</sub>* loci) and *Ubx* bound loci in T3 leg discs  
140 (referred to as *Ubx<sub>T3</sub>* loci; see Methods). This analysis revealed that *Scr<sub>T1</sub>* and *Ubx<sub>T3</sub>*  
141 occupancy scores showed a strong positive correlation (Pearson's correlation  
142 coefficient: 0.706; Extended Data Fig. 4a). Consistently, a majority of binding events are  
143 shared between *Scr<sub>T1</sub>* and *Ubx<sub>T3</sub>* (referred to as *Scr<sub>T1</sub>≈Ubx<sub>T3</sub>* loci), while a subset of loci

144 is strongly biased towards either Scr or Ubx (referred to as  $Scr_{T1} > Ubx_{T3}$  and  
145  $Scr_{T1} < Ubx_{T3}$  loci, respectively; **Fig. 2a**, see **Methods**). Notably, there are ~7-fold more  
146  $Scr_{T1} > Ubx_{T3}$  loci than  $Scr_{T1} < Ubx_{T3}$  loci, suggesting a strong asymmetry in the number of  
147 paralog-specific targets. Compared to  $Scr_{T1} \approx Ubx_{T3}$  loci, paralog-specific ones are more  
148 likely to be intergenic or intronic, suggesting that CRMs are enriched in paralog-specific  
149 loci (**Fig. 2b**).

150

### 151 **Most paralog-specific loci do not show differences in chromatin accessibility**

152 Our results so far reveal that Scr and Ubx have both paralog-specific and shared  
153 targets in T1 and T3 leg discs. Before addressing the functions of these paralog-specific  
154 binding events (see below), we first asked how Scr and Ubx bind to their paralog-  
155 specific targets *in vivo*, despite having very similar DNA binding properties *in vitro*<sup>5-7</sup>. In  
156 some cases, differential chromatin accessibility underlies tissue-specific gene regulation  
157 <sup>16</sup>, we therefore determined the degree to which chromatin accessibility can account for  
158 paralog-specific Hox binding in the leg imaginal discs, using ATAC-seq <sup>17</sup>. We identified  
159 ~20,000 accessible loci in T1 and T3 leg discs (referred to as  $ATAC_{T1}$  and  $ATAC_{T3}$ ).  
160 Generally, the chromatin accessibility profiles of the two leg discs are highly similar  
161 (**Extended Data Fig. 4d**), with little correlation between either  $Scr_{T1}$  binding and T1  
162 accessibility or  $Ubx_{T3}$  binding and T3 accessibility (**Extended Data Fig. 4b and 4c**). The  
163 handful of loci that are more accessible in one disc are biased towards binding the Hox  
164 protein expressed in that disc (**Fig. 2c**), and those exhibiting the most significant  
165 difference in accessibility are located in either the *Antennapedia* complex, where *Scr*  
166 resides, or the *bithorax* complex, where *Ubx* is located (**Supplementary Table 2**). We  
167 also examined the chromatin accessibility in the T2 leg disc and found that it is also very  
168 similar to the T1 and T3 profiles (**Extended Data Fig. 4d**). The similar ATAC-seq profiles  
169 for all three pairs of leg discs suggest that chromatin accessibility is neither altered by  
170 Hox expression nor can it account for paralog-specific Hox-DNA binding.

171

172 **Relative affinities of Hox-Exd dimers, but not Hox monomers, correlate with ChIP-**  
173 **seq patterns**

174 To determine the extent to which paralog-specific binding can be explained by  
175 the intrinsic DNA binding specificities of Hox monomers or Hox-Exd dimers, we used *No*  
176 *Read Left Behind (NRLB)*<sup>18</sup>, a computational method that transforms *in vitro* SELEX-  
177 seq data into models capable of capturing a TF's binding specificity over its entire  
178 affinity range. The  $Scr_{T1} \approx Ubx_{T3}$  loci have a similar normalized mean relative affinity  
179 enrichment score for Scr and Ubx monomer binding near the peak center (Fig. 2d), as  
180 expected. A similar pattern of relative affinity enrichment for both monomers is also  
181 observed for  $Scr_{T1} > Ubx_{T3}$  loci, suggesting that the intrinsic DNA binding specificities of  
182 Scr and Ubx monomers cannot account for  $Scr_{T1} > Ubx_{T3}$  binding. In contrast, there is  
183 strong differential enrichment only for the Scr-Exd motif score in  $Scr_{T1} > Ubx_{T3}$  loci (Fig.  
184 2e).  $Scr_{T1} < Ubx_{T3}$  loci were not analyzed due to low counts. These results suggest that  
185 the latent specificity conferred by heterodimerization between Scr and Exd significantly  
186 contributes to paralog-specific Hox binding genome-wide.

187

188 **Generation of an Scr mutant that is unable to interact with Exd**

189 To definitively test if Exd heterodimerization contributes to paralog-specific  
190 binding, we generated an *Scr* allele that expresses a mutant protein unable to interact  
191 with Exd. We chose to mutate Scr for two reasons: firstly, there were more  $Scr_{T1} > Ubx_{T3}$   
192 loci than  $Scr_{T1} < Ubx_{T3}$  loci (Fig. 2a); and secondly, there is only a single Exd-interacting  
193 W-motif in Scr (Fig. 3a), whereas multiple Exd-interaction motifs are present in Ubx<sup>19,20</sup>.  
194 The resulting *3xFLAG-Scr(YPWM\*)* allele expresses a 3xFLAG-tagged Scr protein with  
195 its YPWM motif mutated to four alanines (Fig. 3b and Extended Data Fig. 2, see  
196 Methods). As with our other edited alleles, multiple independent isolates of this mutant  
197 were isogenized into the  $w^{1118}$  genetic background.

198 The *3xFLAG-Scr(YPWM\*)* allele is lethal as a homozygote, demonstrating that  
199 Scr's YPWM motif is essential for viability. However, this allele only impairs a subset of  
200 known *Scr* functions. For example, homozygous *Scr(YPWM\*)* embryos fail to express

201 *CrebA*, a known *Scr* target<sup>21</sup> in salivary glands (Fig. 3c). In contrast, although the  
202 number of sex combs on the male T1 leg is reduced in *Scr* null/+ heterozygous animals,  
203 the number of sex combs is unaffected in heterozygotes of the *Scr*(YPWM\*) allele (Fig.  
204 3d). The lack of an effect on sex comb number makes sense because these structures  
205 are derived from a part of the leg disc that does not express Homothorax (Hth), a  
206 transcription factor required for Exd's nuclear localization<sup>22</sup> and thus its function as a  
207 Hox cofactor (Fig 5c and 5d). A third well-characterized *Scr* function is the suppression  
208 of the sternopleural (Sp) bristles, which are normally present in T2 but not in T1 legs<sup>23</sup>.  
209 Suppression of these bristles remains intact in T1 legs containing homozygous clones  
210 of the *Scr*(YPWM\*) allele (Fig. 3e). In contrast to the sex combs, the precursors of the  
211 Sp bristles<sup>23</sup>, revealed by the expression of Achaete (Ac), are derived from a region of  
212 the T2 leg disc where Hth is expressed and Exd is nuclear (Fig 3f). Thus, even in cells  
213 where Exd is nuclear, *Scr* can have Exd-independent functions.

214

### 215 **Scr-Exd interaction is required for a subset of Scr-DNA binding events *in vivo***

216 To assess the importance of the Scr-Exd interaction genome-wide, we performed  
217 ChIP-seq experiments with the 3xFLAG-Scr(YPWM\*) protein. Due to the homozygous  
218 lethality of the *3xFLAG-Scr*(YPWM\*) allele, these ChIPs were done with T1 leg discs  
219 from *3xFLAG-Scr*(YPWM\*)/+ heterozygous animals (see Methods). For comparison,  
220 anti-FLAG ChIP-seq experiments were also carried out using T1 leg discs from  
221 *3xFLAG-Scr*/+ heterozygous larvae. This analysis identified three sets of Scr-bound loci  
222 (Fig. 4a and 4d). The largest set is comprised of thousands of loci where the WT and  
223 mutant Scr proteins bind similarly ( $Scr_{T1} \approx Scr(YPWM^*)_{T1}$ ). We infer these loci to be Exd-  
224 independent, because binding does not require the YPWM motif. The second set is  
225 comprised of hundreds of loci where the mutant protein binds significantly more poorly  
226 than WT Scr ( $Scr_{T1} > Scr(YPWM^*)_{T1}$ ). We infer these loci to be Exd-dependent, as they  
227 require Scr's YPWM motif, and Exd is the only known protein to interact with this motif.  
228 The third and smallest set is comprised of loci where mutant occupancy is greater than  
229 WT occupancy (Fig. 4d). This third set may reflect the YPWM mutant's enhanced ability  
230 to bind monomeric Hox binding sites (which are AT-rich) within accessible regions of the



231 genome. Consistent with this notion, binding of the YPWM mutant is skewed towards  
232 AT-rich promoter/TSS regions (Fig. 4b) and the  $Scr_{T1} < Scr(YPWM^*)_{T1}$  loci score strongly  
233 for the Scr monomer *NRLB* model (Fig. 4d).

234 Because the nuclear localization and DNA binding of Exd depend on its  
235 interaction with Hth<sup>22</sup>, Hth ChIP-seq data can be used to infer the genome-wide binding  
236 of Exd. Notably, Hth ChIP-seq from T1 leg discs reveal higher Hth occupancy in  
237  $Scr_{T1} > Scr(YPWM^*)_{T1}$  loci compared to  $Scr_{T1} \approx Scr(YPWM^*)_{T1}$  loci, providing independent  
238 evidence that the  $Scr_{T1} > Scr(YPWM^*)_{T1}$  loci are also bound by Exd. Further, *de novo*  
239 motif discovery identified Hox-Exd binding motifs in  $Scr_{T1}$ , but not  $Scr(YPWM^*)_{T1}$  bound  
240 peaks (Fig. 4c and Extended Data Fig. 3b). Finally, using our *NRLB* models, the Scr-  
241 Exd dimer motif scores are significantly stronger in  $Scr_{T1} > Scr(YPWM^*)_{T1}$  loci, compared  
242 to  $Scr_{T1} \approx Scr(YPWM^*)_{T1}$  loci. In contrast, scoring for the Scr monomer motif reveals a  
243 weak signal near the peak centers of both  $Scr_{T1} > Scr(YPWM^*)_{T1}$  loci and  
244  $Scr_{T1} \approx Scr(YPWM^*)_{T1}$  loci (Fig. 4d).

245

#### 246 **Scr-Exd interaction is required for many, but not all $Scr_{T1} > Ubx_{T3}$ binding events**

247 The above results demonstrate that the binding of Scr to many of its *in vivo*  
248 targets requires its YPWM motif, consistent with a requirement for heterodimerization  
249 with Exd. We next asked to what extent do these Exd-dependent loci account for the  
250  $Scr_{T1} > Ubx_{T3}$  loci described above (Fig. 2a). As a first step, all 432  $Scr_{T1} > Ubx_{T3}$  loci were  
251 ordered by their Exd-dependency, based on the  $Scr_{T1}$  and  $Scr(YPWM^*)_{T1}$  ChIP-seq  
252 results (see Methods for details). Accordingly, the sites that depend the most on Exd  
253 are at the top of these heatmaps, while the sites at the bottom are the most Exd-  
254 independent. Of the 432  $Scr_{T1} > Ubx_{T3}$  loci, 141 are high confidence Exd-dependent Scr-  
255 specific loci, while 172 are high confidence Exd-independent (See Methods). Compared  
256 to their percentage in all Scr bound loci (Fig. 4d), Exd-dependent loci constitute a higher  
257 portion among  $Scr_{T1} > Ubx_{T3}$  loci, consistent with the notion that heterodimerization with  
258 Exd significantly contributes to paralog-specific Scr-DNA binding *in vivo*.

259 Moreover, Hth occupancy at  $Scr_{T1}>Ubx_{T3}$  loci shows a positive correlation with  
260 their Exd-dependency (Fig. 5a). Scr monomer and Scr-Exd dimer relative affinities,  
261 predicted by *NRLB*, also display the expected correlation with Exd-dependency: there is  
262 a clear Scr monomer signature in Exd-independent peaks, while a strong Scr-Exd  
263 heterodimer signature is observed only among the Exd-dependent loci (Fig. 5a).

264 In summary, although a large fraction of the  $Scr_{T1}>Ubx_{T3}$  loci requires Scr's  
265 YPWM motif, suggesting they are Exd-dependent, these results also indicate that there  
266 are Exd-independent mechanisms for Hox proteins to achieve paralog-specific DNA  
267 binding *in vivo*. They also suggest that dependency on Exd is not an all-or-nothing  
268 phenomenon because, depending on the locus, Scr binding requires its YPWM motif to  
269 different degrees.

270

## 271 **Testing the function of paralog-specific Hox binding**

272 Our analyses so far reveal that Exd plays an important role in the binding of Scr  
273 to its paralog-specific targets, i.e., the  $Scr_{T1}>Ubx_{T3}$  loci. Ultimately, it is differential gene  
274 expression that differentiates T1 and T3 leg identities. Therefore, we next investigated  
275 to what extent paralog-specific Scr-DNA binding translates into T1≠T3 target gene  
276 transcription.

277 We first performed ChIP-seq against Creb binding protein (CBP), a known  
278 marker for CRM activity<sup>24</sup>, in T1 and T3 leg discs. In  $Scr_{T1}>Ubx_{T3}$  loci, CBP occupancy  
279 ranges from significantly T1>T3 to markedly T1<T3, and those loci with the highest CBP  
280 signals tend to have T1>T3 CBP occupancy (Fig. 5b). The presence of CBP at  
281  $Scr_{T1}>Ubx_{T3}$  loci suggests that they are indeed active CRMs. In addition, the  
282 observation that among the  $Scr_{T1}>Ubx_{T3}$  loci CBP can be biased to either T1 or T3 leg  
283 discs suggests that Scr may act both to repress transcription (when  $CBP_{T1}<CBP_{T3}$ ) and  
284 to activate transcription (when  $CBP_{T1}>CBP_{T3}$ ). Such a context dependent pattern of  
285 CRM activity is consistent with the expectation for a selector transcription factor like Scr.

286 We next examined the expression of genes near Scr bound loci (Extended Data  
287 Fig. 5). We found that genes near  $Scr_{T1}>Ubx_{T3}$  loci are more likely to be expressed in a

288 T1>T3 pattern, which agrees with the CBP occupancy pattern above. Interestingly,  
289 genes near  $Scr_{T1}>Scr(YPWM^*)_{T1}$  loci also tend to show a T1>T3 expression pattern  
290 (**Extended Data Fig. 5**), suggesting that the Exd-dependent Scr target CRMs tend to be  
291 enhancers, as opposed to silencers. This is consistent with previous work suggesting  
292 that Hth functions as a transcription activator *in vivo* <sup>25</sup>.

293 Finally, to estimate how many of the  $Scr_{T1}>Ubx_{T3}$  events leads to T1≠T3 CRM  
294 activity, we generated *lacZ* reporter genes from twenty-five Exd-dependent  $Scr_{T1}>Ubx_{T3}$   
295 loci (see **Methods**). Eight out of the twenty-five selected loci (~1/3) drove T1>T3  
296 expression, while the rest either drove T1=T3 expression (11 of 25), or were not active  
297 in 3<sup>rd</sup> instar leg discs (6 of 25).

298 In general, one or two putative Hox-Exd binding motifs were readily identified  
299 near the  $Scr_{T1}$  ChIP peak center of each selected CRM, consistent with the pattern of  
300 Scr-Exd dimer motifs shown in **Fig. 5a**. When these Hox-Exd motifs were mutated (4bp  
301 substitutions at the center of the motifs, see **Methods** for details) in three selected  
302 T1>T3 CRMs (*ac-1*, *h-1* and *fj-1*), all three lost expression in leg discs (**Fig. 6a-c**),  
303 indicating direct regulation by Scr-Exd. In contrast, when the highest affinity Hox-Exd  
304 motifs were mutated in three selected CRMs that did not drive T1>T3 expression (2 of  
305 them have T1=T3 expression and one has no expression in leg discs), none showed  
306 any detectable change in reporter expression. Thus, although Scr is bound to these  
307 CRMs, these motifs are not required for CRM activity.

308 The reporter gene results suggest that when the tissue-specific activity of a CRM  
309 agrees with the paralog-specific Hox ChIP pattern at that CRM, it is likely to be directly  
310 regulated by Hox proteins. Given these examples, we estimate that ~1/3 of all paralog-  
311 specific Hox binding events at CRMs directly regulate their activity, and lead to paralog-  
312 specific regulation of transcription.

313

## 314 **Dll is a candidate Scr cofactor in the distal leg domain**

315 As mentioned above, Exd is not present in the nuclei of all leg disc cells, due to  
316 the restricted expression of Hth in the periphery of the leg discs (**Fig. 5c**) that gives rise

317 to the ventral body wall and proximal segments of the adult legs (Fig. 5d). However,  
318 there are well documented Hox-dependent morphological differences between the T1  
319 and T3 legs in the distal domain <sup>26</sup>, suggesting that Hox proteins must execute a subset  
320 of paralog-specific functions in an Exd-independent manner. Since our results suggest  
321 that Hox monomer binding is unlikely to account for paralog-specific *in vivo* binding (Fig.  
322 2d), we hypothesized that there must be additional distal cofactor(s) that contribute to  
323 paralog-specific binding and activity.

324 Notably, the transcription factors Teashirt (Tsh) <sup>27</sup> and Distal-less (Dll) <sup>28</sup> have  
325 been shown to physically interact with Scr, and there is evidence that Disconnected  
326 (Disco) <sup>29</sup> genetically interacts with Scr. In addition, Engrailed (En) and Sloppy-paired  
327 (Slp) <sup>30</sup> have been shown to interact with the abdominal Hox proteins Ubx and Abd-A.  
328 Among these candidates, the homeodomain containing transcription factor Dll stood out  
329 because it is expressed in the distal domain of the leg discs, which is largely  
330 complementary to the Hth-expressing domain (Fig. 5c), and is known to be important for  
331 the identity of the distal leg <sup>31,32</sup>, in part by repressing *hth* expression<sup>33</sup>. Consistent with  
332 previous bimolecular complementation (BiFC) results <sup>28</sup>, we also confirm that Scr and  
333 Dll physically interact by co-immunoprecipitation (Fig. 5e).

334 To initially examine a role for Dll in Hox-DNA binding, we carried out ChIP-seq  
335 experiments for Dll in T1 and T3 leg discs. We observed a striking correlation in which  
336 Exd-independent, but not Exd-dependent Scr<sub>T1</sub>>Ubx<sub>T3</sub> loci have a strong tendency to  
337 bind Dll (Fig. 5a). A similar Dll occupancy gradient is also seen in T3 leg discs (Fig. 5a).  
338 These observations are consistent with a model in which Dll is a Hox cofactor in the  
339 distal leg, in cells where Exd is not available as a cofactor.

340

### 341 **Dll facilitates Scr-DNA binding in a sequence specific manner**

342 If Dll is a bona fide Hox cofactor in the T1 leg disc, we would expect that Scr and  
343 Dll may promote each other's binding to a subset of DNA sequences. To identify  
344 sequences bound by Scr+Dll in an unbiased manner, we used a gel-free SELEX  
345 protocol (see Methods). SELEX libraries were generated and sequenced for Scr, Dll,

346 Scr-Exd (as a positive control), and Scr-Dll, and *NRLB* binding models were generated  
347 (Fig. 7a-d).

348 The Scr and Scr-Exd models agree well with models generated from previous  
349 SELEX data, which used electrophoretic mobility shift assays (EMSAs) to isolate  
350 protein-bound DNAs (Fig. 7a and 7c)<sup>18</sup>. The model obtained with Dll is consistent with  
351 binding by a homeodomain (Fig. 7b). The Scr-Dll *NRLB* model showed a pattern of two  
352 homeodomain monomer binding motifs separated by a spacer of a few base pairs (Fig.  
353 7d). This configuration is distinct from that of Hox-Exd heterodimers (Fig. 7c and 7d), in  
354 which the Hox and Exd half sites partially overlap to form a composite binding motif.

355 EMSAs were unsuccessful at visualizing a DNA-bound Scr-Dll heterodimer,  
356 perhaps due to the non-physiological TBE buffer used in these assays (data not  
357 shown). Instead, a gel-free pull-down assay that uses more physiologically relevant  
358 buffer conditions was performed to characterize Scr-Dll-DNA binding (Fig. 7e and  
359 Methods). Briefly, a biotin-labeled DNA probe is incubated with FLAG tagged Scr  
360 protein, with and without either Exd or Dll. After pull-down with magnetic streptavidin  
361 beads, the DNA bound Scr protein is visualized by western blot.

362 We validated this assay by recapitulating Exd-facilitated Scr binding to two well  
363 characterized Scr-Exd binding motifs (Fig. 7f). Using this assay, Dll is also able to  
364 increase Scr binding to a Scr-Dll binding motif derived from the SELEX data in a  
365 concentration dependent manner. In contrast, a negative control protein, mCherry,  
366 showed no effect on the binding of Scr to this DNA sequence (Fig. 7g and 7h).

367 In summary, these results support the idea that Dll is a novel Hox cofactor, but  
368 that the mechanism by which Dll binds DNA with Scr is distinct from the highly  
369 cooperative binding exhibited by Hox-Exd heterodimers.

370

### 371 **A CRM from the *dsx* gene is activated by Scr-Dll in T1 leg discs**

372 To further test the role of Dll in contributing to paralog-specific Hox functions *in*  
373 *vivo*, the activities of putative CRMs bound by both Scr and Dll in our ChIP-seq datasets

374 were assessed using *lacZ* reporter genes. Nine Exd-independent Scr<sub>T1</sub>>Ubx<sub>T3</sub> CRMs  
375 co-occupied by Dll were tested. Seven generated T1=T3 expression patterns but the  
376 remaining two, named *dsx-1* and *dpy-1*, drove T1≠T3 expression patterns in the Dll  
377 domain of leg discs (Fig. 8), consistent with them being direct paralog-specific Scr-Dll  
378 targets.

379 The *dsx-1* CRM, which is from the *doublesex* (*dsx*) gene, drives expression in  
380 two groups of cells at the center of T1 leg disc from males, with no expression observed  
381 in T3 leg discs or in female T1 leg discs (Fig. 8b). Both the expression pattern and the  
382 sexually dimorphic activity of this CRM agrees with the endogenous *dsx* expression,  
383 which is required for the development of sex combs bristles in the tarsal segments of  
384 male T1 legs<sup>34</sup>. A previous study<sup>35</sup> identified an early foreleg enhancer that overlaps  
385 with the *dsx-1* CRM, but does not recapitulate the endogenous *dsx* expression as  
386 faithfully as the *dsx-1* CRM. The *dpy-1* CRM drives expression in a crescent pattern in  
387 the Dll domain (Fig. 8c). Unexpectedly, the expression driven by *dpy-1* is specific to the  
388 T3 leg disc, potentially reflecting a role for repression by Scr.

389 The *dsx-1* CRM has three Scr ChIP-seq peaks, two of which (peaks 1 and 2) are  
390 Exd-independent and co-occupied by Dll (Fig. 8b). Both of these peaks have multiple  
391 potential homeodomain binding motifs near the peak center, including several matches  
392 to our *NRLB*-derived Scr-Dll dimer motifs. Further, Dll occupancy at peak 2 is stronger  
393 in T1 compared to T3, consistent with the T1>T3 expression pattern (Fig. 8b). Notably,  
394 the DNA sequence at the center of this peak shows an interesting phylogenetic pattern:  
395 the sequence is highly conserved among *Drosophila* species with sex combs, and is  
396 absent in species without sex combs (Extended Data Fig. 6). Due to the presence of  
397 multiple Scr-Dll motifs, we introduced small deletions at the peak center. While a short  
398 deletion of peak 1 does not affect reporter expression (not shown), deleting 40 bp from  
399 peak 2 causes a delayed and weakened expression of the reporter gene, with the most  
400 obvious difference in young pupa (Fig. 8b). *In vitro*, Dll is able to enhance Scr binding to  
401 one of several Scr-Dll binding motifs located at the center of peak 2 (Fig. 7g and 7h).

402 For the *dpy-1* CRM, there are two Scr ChIP peaks, and both are Exd-  
403 independent. As with the sequence from *dsx-1*, Dll assisted Scr binding to the putative

404 Scr-Dll binding motif from peak 2 (Fig. 7g and 7h). Further, although a small deletion at  
405 the center of peak 1 does not affect reporter expression (not shown), deleting about 40  
406 bp from the center of peak 2 resulted in no expression in either T1 or T3 leg discs (Fig.  
407 8c). These results suggest that this deletion removed an input for an essential  
408 transcription activator, precluding us from determining if Scr-Dll is a repressor of this  
409 CRM in the T1 leg disc. Alternatively, it is also possible that Scr, although bound to this  
410 CRM *in vivo*, does not functionally regulate its activity.

411 Lastly, Fig. 5a shows that not all Exd-independent Scr<sub>T1</sub>>Ubx<sub>T3</sub> CRMs have Dll  
412 co-occupancy, implying the existence of additional cofactors that facilitate paralog-  
413 specific binding. To test this, we generated reporter genes for six Exd-independent  
414 Scr<sub>T1</sub>>Ubx<sub>T3</sub> CRMs without Dll binding and, of these, three displayed T1>T3 expression  
415 patterns (Fig. 8a and Extended Data Fig. 7). Thus, we conclude that there are additional  
416 mechanisms and/or cofactors beyond Dll and Exd that contribute to paralog-specific  
417 Hox binding and activity.

418

## 419 Discussion

420 In this study we used a combination of whole-genome and mechanistic  
421 approaches to understand how serially homologous appendages, such as the fly T1 and  
422 T3 legs, obtain their unique morphologies due to the activities of parallel Hox gene  
423 networks. The very similar transcriptomes in the three pairs of leg discs suggest that the  
424 different morphologies are largely a consequence of changing the expression patterns  
425 of the same sets of genes. By comparing the genome-wide DNA binding profiles of the  
426 two relevant Hox paralogs, Scr and Ubx, in their native physiological contexts, we found  
427 hundreds of paralog-specific Hox targets, accounting for ~8% of all binding events for  
428 these two Hox proteins. Next, we showed that differences in chromatin accessibility and  
429 Hox monomer binding preferences are unlikely to account for paralog-specific binding.  
430 Instead, we demonstrate that interaction with the Hox cofactor Exd explains a large  
431 fraction of Scr's paralog-specific binding events. Finally, we identified Dll as a novel Hox  
432 cofactor in the complementary distal domain of the leg disc. Results from RNA-seq,



433 CBP ChIP and reporter assays suggest that about 1/3 of the paralog-specific Scr  
434 binding events are functional and lead to tissue-specific gene regulation. Thus, paralog-  
435 specific Hox-DNA binding, which is mediated by multiple cofactors including Exd and  
436 Dll, contribute significantly to paralog-specific Hox gene networks.

437

### 438 **Exd plays a major role in regulating paralog-specific Hox gene networks**

439 Previous *in vitro* studies provided compelling evidence that the DNA binding  
440 specificities of different Hox-Exd dimers are more divergent from each other than those  
441 of Hox monomers, a phenomenon termed latent specificity<sup>8</sup>. There have also been  
442 many *in vivo* examples in which paralog-specific Hox DNA binding and target regulation  
443 was shown to depend on an interaction with Exd<sup>36-40</sup>. Here we show that, on a genome-  
444 wide scale, the interaction with Exd explains a significant fraction of paralog-specific  
445 Hox binding, which often leads to paralog-specific gene regulation.

446 Earlier work also suggested that there is a tradeoff between specificity and  
447 affinity for Hox-Exd binding motifs, where high affinity binding motifs are more likely to  
448 have low specificity for different Hox-Exd heterodimers<sup>39</sup>. We find that the paralog-  
449 specific, Exd-dependent CRMs characterized here (*ac-1*, *h-1* and *fj-1*), have higher  
450 affinity Hox-Exd binding motifs than those previously described in the *shavenbaby* (*svb*)  
451 gene<sup>18</sup>: the major Scr-Exd motif in the *fj-1* CRM has an affinity of about 0.06 relative to  
452 the optimal motif in the genome, while the motifs in *ac-1* and *h-1* have even higher  
453 relative affinities of nearly 0.15 and 0.2, respectively (Fig. 6b-d). In contrast, the Ubx-  
454 Exd binding motifs in CRMs from *svb* have a relative affinity of <0.01<sup>18</sup>. One possible  
455 explanation for this difference is that the *svb* CRMs are active in embryos, which have  
456 many different cell types, while the CRMs characterized here are active in leg discs,  
457 which have significantly less cell-type complexity. Embryonic CRMs may require  
458 especially low affinity binding motifs to distinguish their activities in a complex cellular  
459 environment. Consistent with this idea, the *fkx250* CRM, which is also active in  
460 embryos, uses an Scr-Exd binding motif with a low relative affinity of 0.017<sup>18,36</sup>.  
461 Notably, the relative affinities for the Scr-Exd binding motifs in *ac-1*, *h-1*, and *fj-1* are at  
462 least 8-fold higher than for Ubx-Exd (Fig. 6b-d). Manual inspection of other intergenic



463 and intronic loci with Scr<sub>T1</sub>>Ubx<sub>T3</sub> binding suggests that there are many other CRMs that  
464 follow this same rule. Thus, for specificity to occur, the most relevant feature may be  
465 that the affinity for the “correct” TFs, in this case Scr-Exd, must be significantly greater  
466 compared to the affinity for other “incorrect” TFs that are co-expressed in the same or  
467 homologous cells.

468

## 469 **Dll, a novel Hox cofactor**

470 Because Exd is only nuclear in a subset of cells during *Drosophila* development,  
471 such as the proximal domain of the leg disc, it was unlikely that Exd was the only Hox  
472 cofactor. In fact, CRMs that are directly regulated by Ubx have been described in cells  
473 where Exd is not available to be a cofactor<sup>41,42</sup>. However, it has remained an unresolved  
474 question whether non-Exd cofactors are used in these examples. More generally for the  
475 leg imaginal disc, the entire distal domain, extending from the trochanter to the tarsus, is  
476 without nuclear Exd, yet has Hox-dependent segment-specific morphological  
477 characteristics, such as the sex combs on the male T1 leg. Although several candidate  
478 TFs have been proposed to be Hox cofactors<sup>27-30</sup>, none have been confirmed. In this  
479 study, we provide evidence that Dll is a novel, distally acting Hox cofactor in leg discs.

480 There are many differences between how Exd and Dll interact with Hox proteins  
481 when bound to DNA. The Scr-Exd binding motif is comprised of two partially  
482 overlapping half sites, while the Scr-Dll motif consists of two HD binding motifs  
483 separated by a spacer of several base pairs. Another difference is that the amount of  
484 cooperativity observed for Hox-Exd is far greater than that observed for Hox-Dll. The  
485 overlapping nature of the Hox and Exd binding motifs may be important for latent  
486 specificity, which for Scr requires an Exd-induced conformational change of the  
487 homeodomain<sup>43</sup>. In contrast, there is no evidence that latent specificity occurs as a  
488 consequence of Hox-Dll binding. Instead, the modest cooperativity observed for the Scr-  
489 Dll heterodimer is likely a consequence of increasing Scr DNA binding affinity via a  
490 protein-protein interaction and closely spaced Dll and Scr binding motifs.

491 More generally, we suggest that mode of DNA binding exhibited by Hox-Exd,  
492 which is highly cooperative and reveals latent specificity, may be the exception rather  
493 than the rule for TF-TF interactions within CRMs, and that the Scr-Dll example, with  
494 weak cooperativity between TFs stemming from a protein-protein interaction, may be  
495 the more common mode of interaction to distinguish the binding of paralogous TFs. In  
496 support of this notion, a systematic *in vitro* study identified 315 TF-TF interactions, only  
497 five of which exhibited latent specificity <sup>44</sup>.

498 The TALE homeodomain proteins, which include Exd and Hth, are very ancient  
499 TFs that were present before the split of plants and animals, and TALE mediated  
500 nuclear localization analogous to the Hth-Exd example in flies has been described in  
501 plants <sup>45</sup>. In contrast, the Hox gene family is only present in metazoans <sup>46</sup>, and Dll is  
502 specific to bilaterians <sup>47</sup>. Moreover, it has been proposed that Dll initially functioned in  
503 the CNS, and was later coopted to pattern the distal appendage <sup>47</sup>. Based on these  
504 observations, it is plausible that the Hox-Dll interaction evolved more recently than the  
505 Hox-Exd interaction, accounting for why Exd interacts with all Hox paralogs, while Dll  
506 may be a more limited Hox cofactor. This is supported by the results from a small scale  
507 bimolecular fluorescence complementation (BiFC) screen that revealed Dll interacts  
508 with some Hox proteins, but not others <sup>28</sup>.

509 Notably, the combined activities of Exd and Dll still do not account for all  
510 Scr<sub>T1</sub>>Ubx<sub>T3</sub> binding events genome-wide and our reporter analysis suggests the  
511 presence of additional, yet to be identified Hox cofactors that have the capacity to  
512 promote Scr-specific binding. We suggest that the Hox-Dll mode of binding uncovered  
513 here may be representative of many additional TFs that have the ability to promote  
514 paralog-specific Hox binding and activity at specific CRMs. Further, we note that the  
515 differentiation of the T1 and T3 leg fates is a continuous developmental process and  
516 that the observations described here are limited to the late 3<sup>rd</sup> instar stage.  
517 Nevertheless, we expect that the principles governing Hox paralog specificity uncovered  
518 here will likely extend to other developmental stages and tissues. Finally, although we  
519 focus here on the role of paralog-specific TF-DNA binding, we note that there may be

520 additional mechanisms that do not depend on differences in DNA binding between  
521 paralogous TFs that also contribute to their specific functions.

522

## 523 **Acknowledgements**

524 We thank K. Monahan for help with ChIP-seq data analysis; J. F. Kribelbauer and C. E.  
525 Howard for assistance on data analysis and visualization; R. Delker for help on confocal  
526 imaging and image processing; S. Davis for assistance in stereoscope imaging; M.  
527 Mannervik for the CBP antibody; and all present and past members of the Mann lab for  
528 discussions and comments. This work was supported by NIH grants R35 GM118336 to  
529 R.S.M. and R01 HG003008 to H.J.B.

530

## 531 **Author contribution**

532 R.S.M. conceived the study. S.F. and R.S.M. designed the study. R.E.L. generated the  
533 ATAC-seq data. S.F. performed all other experiments. C.R. performed NRLB motif  
534 analysis with input from S.F. and H.T.R. W.J.G. performed phylogenetic analysis of the  
535 *dsx-1* CRM and analyzed SELEX-seq results with S.F. S.F. and R.S.M. performed all  
536 other data analyses. H.J.B. supervised *NRLB* analysis, and provided input and  
537 expertise. S.F. and R.S.M. wrote the manuscript. R.S.M. supervised the entire study.

538

## 539 **Declaration of Interests**

540 The authors declare no competing interests.

541

## 542 **Methods**

543 Testing a pair of TALENs targeting the *Scr* locus

544 A pair of TALENs targeting the sequence between the ATG start codon and the YPWM  
545 encoding sequence of the *Scr* gene were purchased from the University of Utah  
546 Mutation Generation and Detection Core Facility. To make sure there were no SNPs  
547 relative to the reference *Drosophila melanogaster* genomic sequence that might  
548 interfere with the TALENs, the genomic fragment near the desired TALEN target site  
549 was PCR amplified from the *yw* strain and the *ligase 4* mutant strain (Bloomington  
550 #28877), two possible recipient strains for the TALEN targeting experiments, and  
551 sequenced. The actual *Scr* locus genomic sequence was analyzed by the University of  
552 Utah Mutation Generation and Detection Core Facility, and a few satisfactory candidate  
553 TALEN targets were identified. Eventually, one target was chosen, and two plasmids  
554 encoding the TALEN pair targeting the chosen locus were generated. The TALEN target  
555 sequence and the sequences of the TALEN encoding plasmids are in **Supplemental**  
556 **Tabel 3**.

557 The TALEN encoding plasmids were linearized with NotI (NEB R0189S), which cut  
558 once downstream of the TALEN ORF, and gel purified. The linearized plasmids were  
559 used as template to generated mRNA by *in vitro* transcription using the AmpliScribe  
560 SP6 Transcription Kit (Epicentre AS3106), followed by capping using the ScriptCap  
561 m<sup>7</sup>G Capping System (Cellscript C-SCCE0625). A mix containing 200 ng/μl of each  
562 TALEN mRNA was used to inject the *yw* strain to test the efficiency of the TALENs. The  
563 injections were performed by the BestGene Inc.

564 The injected G0 flies were individually crossed to *MKRS/TM6B* flies, and the F1 males  
565 were screened for reduced number of sex comb teeth, the classic *Scr* phenotype. About  
566 15% of G0 flies gave at least one male F1 with this *Scr* loss-of-function phenotype.  
567 Stocks were generated from a few selected F1 males with the *Scr* phenotype and  
568 analyzed. All had frameshift mutations (most of them were deletions, but a few were  
569 insertions) at the TALEN target site, and failed to complement with classic *Scr* null  
570 alleles *Scr*<sup>2</sup> and *Scr*<sup>4</sup>. One of such alleles, named *Scr*<sup>C8-1</sup>, has a 47bp deletion at the  
571 TALEN site, and is predicted to encode a 32 amino acid peptide, and only the first 10  
572 amino acids match the wild type *Scr* peptide sequence. This allele was used in a

573 number of experiments in this study as the *Scr* null allele, and its full sequence is listed  
574 in [Supplemental Table 3](#).

#### 575 The generation of *Scr* targeting donor plasmid

576 The entire 8kb *Scr* fragment containing all desired mutations was assembled from 3  
577 smaller fragments: *Scr*-1, *Scr*-2 and *Scr*-3. Molecular cloning was performed using  
578 standard procedures, and all PCR reactions were performed with the Phusion DNA  
579 polymerase (NEB M0530S). All restriction enzymes were purchased from NEB, and all  
580 primer sequences were listed in [Supplemental Table 4](#).

581 From genomic DNA extracted from the *ligase 4* mutant line (Bloomington #28877), the  
582 3.6 kb *Scr*-1, 1.8 kb *Scr*-2, and 3.3 kb *Scr*-3 fragments were PCR amplified using  
583 primers *Scr*-1-5' + *Scr*-1-3', *Scr*-2-5' + *Scr*-2-3' and *Scr*-3-5' + *Scr*-3-3' respectively. The  
584 purified PCR fragments were digested with XbaI + XhoI, and individually cloned into the  
585 pBluecript vector digested with XbaI + XhoI, generating constructs PBS-*Scr*-1, PBS-*Scr*-  
586 2 and PBS-*Scr*-3. All constructs were verified by restriction digestion and sequencing.

587 The YPWM-AAAA mutation was then introduced into the PBS-*Scr*-2 construct. The  
588 PBS-*Scr*-2 construct was PCR amplified using primers *Scr*-YPWM-AAAA-5' and *Scr*-  
589 YPWM-AAAA-3', followed by DpnI digestion at 37°C. The digested DNA was used to  
590 transform DH5α competent cells, and the transformants were analyzed by DNA  
591 sequencing to identify clones successfully mutated. Next, the mutagenesis of TALEN  
592 targeting site and the insertion of the 3xFLAG tag were achieved sequentially by  
593 overlapping extension PCR based mutagenesis. In each round of mutagenesis, the  
594 plasmid was used as the template, and M13 primer + reverse mutagenesis primer, as  
595 well as M13R primer + forward mutagenesis primer, were used as primer combinations  
596 to PCR amplify the two half fragments. The two half fragments were then used as the  
597 templates and M13 + M13R primers were used to amplify the complete mutant  
598 fragment. The mutant fragment was then digested with XbaI + XhoI, and cloned into  
599 pBluescript vector digested with XbaI + XhoI. All constructs were verified by restriction  
600 digestion and DNA sequencing. The final construct was named as PBS-*Scr*-2(m).

601 Next, the Scr-1 fragment was excised from PBS-Scr-1 by XbaI + BclI digestion, and the  
602 mutant Scr-2 fragment was excised from PBS-Scr-2(m) by BclI + RsrII digestion. Both  
603 fragments were inserted into XbaI + RsrII digested PBS-Scr-3 through multi-fragment  
604 ligation, resulting in construct PBS-Scr(m). This construct was verified by restriction  
605 digestion, and all ligation junctions were sequenced to make sure no mutations were  
606 introduced. A construct containing the 3xP3-RFP cassette flanked by multiple unique  
607 restriction sites was previously generated. In the last step of cloning, the 3xP3-RFP  
608 fragment was excised from this construct by ZraI + XhoI digestion, and ligated into the  
609 PBS-Scr(m) construct sequentially treated with AsiSI digestion, T4 DNA polymerase  
610 treatment to convert sticky ends to blunt ends, and second digestion with XhoI. The final  
611 targeting plasmid was verified by restriction digestion, and its ligation junctions were  
612 sequenced to make sure no mutations were introduced.

#### 613 The generation of 3xFLAG-Scr, 3xFLAG-Scr(YPWM-AAAA) and 3xFLAG-Ubx alleles

614 Having verified the efficiency of the Scr TALENs, a mixture containing 500 ng/μl of each  
615 TALEN mRNA, as well as 500 ng/μl of the donor plasmid, was used to inject embryos.  
616 The *ligase 4* mutant line (Bloomington #28877) was selected as the recipient strain to  
617 suppress unwanted non-homologous end joining (NHEJ) events<sup>48,49</sup>, therefore boosting  
618 the desired homologous recombination events. The injection was performed by the  
619 BestGene Inc.

620 The injected G0 flies were individually crossed to *TM3/TM6B* flies, and in the next  
621 generation, paired crosses were set up between one single F1 male and one single F1  
622 female from the same G0 cross. As many as 20 paired crosses were established for  
623 each G0 cross. Therefore, as many as 40 F1 flies from each G0 parent were screened.  
624 After a few days when F2 larval activity became obvious, the 20 F1 flies from 10 paired  
625 crosses were pooled in one 1.5 ml tube, and their genomic DNA extracted. PCR with  
626 *taq* DNA polymerase (NEB M0273S) followed by agarose gel electrophoresis was used  
627 to screen for the presence of the 3xFLAG tag and the YPWM-AAAA mutation. Primers  
628 3xFLAG-check-5' + 3xFLAG-check-3' and YPWM-AAAA-check-5' + YPWM-AAAA-  
629 check-3' were used. If a positive signal was detected, the 10 paired crosses that  
630 comprised the sample with the positive signal were then analyzed. A few F2 individuals

631 from each paired cross were used to extract genomic DNA, and the same PCRs were  
632 used to screen for the positive signals. Once the signals were narrowed down to  
633 individual paired crosses, PCR was used to look for the presence of the 3xP3-RFP  
634 cassette using primers 3xP3-RFP-check-5' and 3xP3-RFP-check-3'. The presence of  
635 this cassette indicated whole plasmid integration events, and such stocks were  
636 excluded from further analysis. A few TM3 or TM6B balanced F2 males (each one might  
637 or might not have the desired mutation(s)) were selected from each positive paired  
638 cross to set up individual crosses and establish stocks. The final stocks were screened  
639 by PCR similarly for the presence of the 3xFLAG tag and/or the YPWM-AAAA mutation,  
640 as well as the 3xP3-RFP cassette. Only one positive stock was kept from each G0 fly to  
641 make sure all lines were independent. Sometimes the same G0 gave both *3xFLAG-Scr*  
642 and *3xFLAG-Scr(YPWM\*)* alleles. In such cases, one stock of each genotype was kept.  
643 All final stocks were also screened under fluorescent scope to make sure there was no  
644 eye-specific RFP expression, and were verified by southern blot analysis and DNA  
645 sequencing. The generation of the *3xFLAG-Ubx* allele was described in <sup>13</sup>. *3xFLAG-*  
646 *Scr<sup>C18-6</sup>*, *3xFLAG-Ubx<sup>7</sup>* and *3xFLAG-Scr(YPWM-AAAA)<sup>D8-16</sup>* alleles were used  
647 throughout this study. The sequences of all primers used in the screening were listed in  
648 **Supplemental Table 4.**

#### 649 Southern blot

650 Southern blot analysis was performed using the DIG High Prime DNA Labeling and  
651 Detection Starter Kit II (Roche 11585614910) and the DIG Wash and Block Buffer Set  
652 (Roche 11585762001). 5 to 10 ug of genomic DNA (roughly genomic DNA extracted  
653 from about 15 adult flies) was digested with selected restriction enzymes in 30 ul  
654 reactions, and the entire samples were run on a 1% agarose gel. The DIG labeled DNA  
655 marker II (Roche 11218590910) was used to determine band size, and appropriate  
656 amount of ClaI digested targeting donor plasmid was used as a positive control. All  
657 subsequent treatments of the gel were performed at room temperature. After separating  
658 the DNA fragments by gel electrophoresis, the gel was denatured by two washes with  
659 2.5 gel volumes of denature solution (0.5M NaOH, 1.5M NaCl), 15 minutes each, then  
660 neutralized by two washes with 2.5 gel volumes of neutralization solution (0.5M Tris-



661 HCl, 1.5M NaCl, adjusted to pH7.5 with HCl), 15 minutes each. The gel was then  
662 washed once with 2.5 gel volumes of 20xSSC (3M NaCl, 300mM sodium citrate,  
663 adjusted to pH7.0 with HCl) for 10 minutes. A standard DNA transfer apparatus was  
664 then assembled, and the DNA on gel was transferred to Nylon membrane, positively  
665 charged (Roche 11417240001) for 20-24 hours by capillary effect. 20xSSC was used as  
666 the transfer solution.

667 The DNA was then UV crosslinked to the Nylon membrane using a UV Stratalinker  
668 1800 with build-in auto-crosslink settings. The membrane was then briefly washed with  
669 2xSSC and prehybridized with 20 ml of DIG Easy Hyb at 42°C for 1 hour according to  
670 the manufacturer's instructions. The DIG labeled probe was generated according to the  
671 manufacturer's instructions. The 8kb *Scr* locus DNA fragment in the targeting donor  
672 plasmid was used as template to generate labeled probe. This fragment was too long so  
673 it was first digested with XmnI. 800 ng of the digested DNA was used as template and a  
674 7-hour labeling reaction was performed. After prehybridization, 6 ul of the DIG labeled  
675 probe was added to 6 ml of DIG Easy Hyb, and hybridization was performed at 42°C  
676 overnight.

677 The membrane was washed twice with 100 ml of 2xSSC, 0.1% SDS at room  
678 temperature for 15 minutes with gentle shaking. The membrane was then washed twice  
679 with 100 ml of 0.5xSSC, 0.1% SDS at 65°C for 15 minutes with rotation in a  
680 hybridization oven, and the solution was pre-heated to 65°C before the washes. All  
681 subsequent treatments of the membrane were performed at room temperature. The  
682 membrane was briefly rinsed with 30-50 ml of washing buffer, and blocked with 100 ml  
683 of blocking solution for 30 minutes with gentle shaking. Next, the membrane was  
684 incubated with 30 ml of antibody solution for 30 minutes with gentle shaking. The  
685 membrane was then rinsed with 30-50 ml of washing buffer, and washed twice with 100  
686 ml of washing buffer for 15 minutes with gentle shaking. Finally, the membrane was  
687 equilibrated with 35 ml of detection buffer for 5 minutes. 1ml of the chemiluminescent  
688 substrate CSPD was applied to the membrane and a standard film exposing cassette  
689 was assembled and incubated at 37°C for 10 minutes. Films were then exposed for  
690 desired time period to obtain optimal signal intensity.



## 691 Imaging of adult flies and adult fly legs

692 Legs from adult males of the isogenic  $w^{1118}$  line (Bloomington #5905) were imaged for  
693 **Fig. 1a**. The same isogenic  $w^{1118}$  line was also used in **Fig. 3e (left)** as the wild type. In  
694 order to obtain adult flies consisted mostly of homozygous cells mutant for desired *Scr*  
695 alleles in thoracic appendages, the *Minute* technique<sup>50</sup> was used. *Dll-Gal4*, which is  
696 expressed in all leg disc cells early in development, was described in<sup>50</sup>, and the *Minute*  
697 allele *Rps3\** (Bloomington #5699) and *Ubi-mRFPnls* (Bloomington #30555) were  
698 ordered from the Bloomington Stock Center. Adults in **Fig. 3e (middle)** were obtained by  
699 the following cross: *Dll-Gal4, UAS-FLP/CyO, Act-GFP; FRT82B, Scr<sup>C8-1</sup>/TM6B* ⊗  
700 *FRT82B, Rps3\*, Ubi-mRFPnls/TM6B*, and adults in **Fig. 4e (right)** were obtained  
701 similarly by this cross: *Dll-Gal4, UAS-FLP/CyO, Act-GFP; FRT82B, 3xFLAG-*  
702 *Scr(YPWM-AAAA)<sup>D8-16</sup>/TM6B* ⊗ *FRT82B, Rps3\*, Ubi-mRFPnls/TM6B*.

703 All fly legs and adult flies were imaged using Nikon SMZ18 stereomicroscope and  
704 processed with the Nikon software NIS-Elements D4.60.00.

## 705 Counting sex comb teeth numbers

706 For each genotype of interest, 40 T1 legs from 20 males were counted. The flies were  
707 rinsed in 100% ethanol to remove body wax, and then washed briefly with PBS + 0.1%  
708 Triton X-100. The T1 legs were removed from the flies and transferred to a slide with a  
709 drop of PBS + 0.1% Triton X-100. After all legs were transferred to the slide, the legs  
710 were adjusted under the dissection scope such that the sex comb teeth were all facing  
711 up, and all legs were aligned in 2 to 3 rows. A coverslip was placed on the samples, and  
712 the slide was sealed with nail polish. The number of sex comb teeth were then counted  
713 under a Zeiss Axio Imager microscope. The plots showing the final results were  
714 generated using the R package ggplot2.

## 715 The generation of lacZ reporter flies

716 The lacZ reporter constructs were generated by cloning PCR amplified enhancer  
717 fragments into the lacZ vector pRVV54<sup>51</sup>, which has an attB site, a mini-white marker  
718 gene, and a multiple cloning site upstream of the nuclear lacZ sequence. The genomic  
719 coordinates of each enhancer are detailed in **Supplemental Table 5**, and all primers

720 used are listed in **Supplemental Table 4**, and all restriction enzymes were purchased  
721 from NEB.

722 All candidate enhancers were amplified by PCR from genomic DNA extracted from the  
723 isogenic  $w^{1118}$  line (Bloomington #5905) using the Phusion DNA polymerase (NEB  
724 M0530S). The PCR products were cloned into the pRVV54 vector by restriction cloning.  
725 All constructs were verified by restriction digestion and sequencing with pRVV54-up and  
726 pRVV54-down primers. For long enhancers, internal sequencing primers were also  
727 used. The PCR products were also sequenced with the PCR primers (and internal  
728 primers when applicable) to make sure there was no PCR introduced mutations.

729 To mutate the selected Hox-Exd motifs or to generate small deletions, overlapping  
730 extension PCR was performed using the wild type PCR product as template. The  
731 forward PCR primer and the reverse mutagenesis primer were used to amplify the left  
732 half fragment, and the reverse primer and forward mutagenesis primer were used to  
733 amplify the right half fragment. Then both half fragments were used as templates, and  
734 the two PCR primers were used to perform overlapping extension PCR. The final  
735 mutant PCR products were digested with the same restriction enzymes selected for the  
736 corresponding wild type PCR products, and cloned into the pRVV54 vector. All mutant  
737 reporter constructs were verified by restriction digestion and sequencing.

738 All verified reporter constructs were injected into recipient flies with the attP40 landing  
739 site, and transformants were selected by the presence of the mini-white marker. All  
740 injections were performed by the BestGene Inc.

#### 741 Leg disc antibody staining

742 The isogenic  $w^{1118}$  line (Bloomington stock #5905) was used in the staining in **Fig. 1b**,  
743 the yw line was used in **Fig 3f and Fig 5c**, and fly lines bearing lacZ reporter transgenes  
744 were stained with  $\beta$ -Gal antibody. The following primary antibodies were used in this  
745 study: polyclonal guinea pig anti-Scr (GP111) was a custom-made antibody and was  
746 used at 1:2000 (**Fig 1a**), monoclonal mouse anti-Scr (6H4.1, hybridoma bank) was used  
747 at 1:40 (**Fig 5c**), monoclonal mouse anti-Ubx (FP3.38, hybridoma bank, ascites) was  
748 used at 1:100, monoclonal mouse anti-Ac (hybridoma bank) was used at 1:5,

749 polyclonal rabbit anti- $\beta$ -Gal (MP Biomedicals, cat #559762, lot #06825) was used at  
750 1:4000, polyclonal guinea pig anti-Hth<sup>36</sup> was used at 1:2000 (Fig 3f), polyclonal rabbit  
751 anti-Hth<sup>52</sup> was used at 1:1000 (Fig 5c) and guinea pig anti-DII<sup>53</sup> was used at 1:2000.  
752 The following commercial secondary antibodies were used in this study: goat anti-  
753 mouse IgG Alexa Fluor 488 (Molecular Probes A11029), Goat anti-rabbit IgG Alexa  
754 Fluor 488 (Molecular Probes A11034), Goat anti-GP IgG Alexa Fluor 488 (Molecular  
755 Probes A11073), goat anti-guinea pig IgG Alexa Fluor 647 (Molecular Probes A-21450),  
756 Goat anti-mouse IgG Alexa Fluor 555 (Molecular Probes A-21424), goat anti-guinea pig  
757 IgG Alexa Fluor 555 (Molecular Probes A-21435), and goat anti-rabbit IgG Alexa Fluor  
758 555 (Molecular Probes A-21429). All secondary antibodies were used at 1:1000 except  
759 goat anti-guinea pig IgG Alexa Fluor 647, which was used at 1:500.

760 Leg disc antibody staining was performed using standard protocol. Briefly, wandering  
761 larvae of desired genotype were pulled apart, and the anterior halves were inverted in  
762 PBS. The gut, fat bodies and salivary glands were then removed, followed by fixation in  
763 PBS + 0.1% Triton X-100 + 4% formaldehyde at room temperature with rotation for 20  
764 minutes. After washing 3 times with PBS + 1% Triton X-100 at room temperature with  
765 rotation, 5 minutes each, the samples were blocked with blocking solution (PBS + 1%  
766 Triton X-100 + 1% BSA) for 1 hour at room temperature with rotation. The samples were  
767 then incubated with primary antibody in blocking solution at 4°C overnight with rotation.  
768 Next, the samples were rinsed briefly with PBS + 1% Triton X-100, followed by 3  
769 washes with PBS + 1% Triton X-100 at room temperature with rotation, 30 minutes  
770 each. The samples were then incubated with secondary antibody in blocking solutions  
771 for 2 to 4 hours in dark at room temperature with rotation. Next, the samples were briefly  
772 rinsed with PBS + 1% Triton X-100, and then washed 3 times with PBS + 1% Triton X-  
773 100 in dark at room temperature with rotation, 30 minutes each. The target discs were  
774 then dissected from the samples in PBS + 1% Triton X-100, and transferred to a 1.5ml  
775 tube containing PBS + 1% Triton X-100. The supernatant was removed and a drop of  
776 Vectashield mounting medium with DAPI (Vector Laboratories H-1200) was added. The  
777 samples were placed at 4°C overnight in dark to let the discs settle. The discs were then  
778 mounted on a slide and imaged with Leica SP5 II confocal microscope. The images  
779 were processed with the software Fiji.

## 780 Embryo antibody staining

781 The *yw* line was used as wild type. The null allele *Scr<sup>C8-1</sup>* and the YPWM motif mutant  
782 allele *3xFLAG-Scr(YPWM\*)<sup>D8-16</sup>* are both homozygous lethal, so they were balanced  
783 with the *TM3, twi-Gal4, 2xUAS-EGFP* balancer<sup>54</sup> in order to identify homozygous  
784 mutant embryos. The following primary antibodies were used: polyclonal rabbit anti-  
785 CrebA<sup>55</sup> was purchased from DSHB and was used at 1:20,000 (after 3 rounds of pre-  
786 absorption with wild type embryos to reduce non-specific signal), and chicken anti-GFP  
787 (abcam ab13970) was used at 1:1000. The following secondary antibodies were used,  
788 all at 1:1000 dilution: goat anti-rabbit IgG Alexa Fluor 555 (Molecular Probes A-21429),  
789 and goat anti-chicken IgY DyLight 488 (Invitrogen SA5-10070).

790 The embryos were collected and stained with standard protocols. Briefly, the embryos  
791 were collected overnight using standard embryo collection cages supplied with fresh  
792 yeast paste. The embryos were dechorionated with 50% bleach at room temperature for  
793 3 minutes, followed by thorough washes with deionized water. The dechorionated  
794 embryos were then transferred into a glass vial containing 1 volume of heptane and 1  
795 volume of PBS + 4% formaldehyde, and shaken vigorously for 20 minutes at room  
796 temperature. The lower phase, as well as any embryos in it, was removed, and 1  
797 volume of methanol was added. The vial was shaken vigorously for 1 minute at room  
798 temperature to remove the vitelline membrane. The devitellinized embryos should sink  
799 to the bottom of the glass vial, and were collected and transferred to 1.5 ml tubes. The  
800 fixed embryos were washed 3 times with methanol, and could be stored at -20°C for  
801 months before antibody staining.

802 The fixed embryos were rehydrated by washing once with methanol, once with 1:1 mix  
803 of methanol and PBS + 1% Triton X-100, and twice with PBS + 1% Triton X-100. All  
804 washes were 5 minutes each at room temperature with rotation. The embryos were then  
805 blocked in blocking solution (PBS + 1% Triton X-100 + 1% BSA) at room temperature  
806 for 1 hour with rotation. The blocked embryos were incubated with primary antibody in  
807 blocking solution at 4°C overnight. Next, the embryos were briefly rinsed, and then  
808 washed 3 times with PBS + 1% Triton X-100 at room temperature with rotation, 30  
809 minutes each. The embryos were then incubated with secondary antibody in blocking

810 solution for 2-4 hours in dark at room temperature with rotation. Next, the embryos were  
811 rinsed briefly with PBS + 1% Triton X-100, followed by 3 30-minute washes with PBS +  
812 1% Triton X-100 in dark at room temperature with rotation. The supernatant was  
813 removed from the tubes, and a few drops of Vectashield mounting medium with DAPI  
814 (Vector Laboratories H-1200) were added to each sample. The stained embryos were  
815 stored at 4°C overnight to let the embryos settle to the bottom of the tubes. The  
816 embryos were then mounted on slides and imaged using a Leica SP5 II confocal  
817 microscope. All images were processed with the Fiji software.

#### 818 Preparation of disc chromatin for ChIP

819 The procedure for preparing chromatin from imaginal discs was modified from a  
820 previously published protocol<sup>53</sup>. About 200 leg discs were used in each ChIP  
821 experiment. Wandering larvae of the desired genotype were taken from vials and  
822 washed thoroughly to remove any food debris. The larvae were pulled apart in room  
823 temperature PBS, and the anterior halves were immediately transferred to ice cold PBS.  
824 After all samples were transferred, they were inverted in ice cold PBS, and the samples  
825 were kept cold as much as possible during the procedure. The inverted samples were  
826 then crosslinked in a 15 ml falcon tube containing 10 ml of crosslinking solution (10mM  
827 HEPES pH8.0, 100mM NaCl, 1mM EDTA pH8.0, 0.5mM EGTA pH8.0, filtered) plus  
828 freshly added 270 ul of 37% formaldehyde (final formaldehyde concentration ≈1%). The  
829 samples were rotated in room temperature for 10 minutes. Next, 1 ml of 2.5M glycine  
830 was added, and the tube was inverted by hand for about 1 minute. After the samples  
831 were settled to the bottom of the tube, the supernatant was removed with a pipette, and  
832 10 ml of quench solution (1xPBS, 125mM glycine, 0.1% Triton X-100, autoclaved) was  
833 added and the tube was rotated at room temperature for at least 6 minutes. The  
834 samples were then washed twice with 10 ml of ice-cold buffer A (10mM HEPES pH8.0,  
835 10mM EDTA pH8.0, 0.5mM EGTA pH8.0, 0.25% Triton X-100, filtered) plus protease  
836 inhibitors (cOmplete™, Mini, EDTA-free Protease Inhibitor Cocktail, Roche  
837 11836170001), 10 minutes each at 4°C with rotation. Next, the gut, fat bodies and  
838 salivary glands were removed from all samples in ice-cold buffer A with protease  
839 inhibitors, and the samples were kept cold as much as possible. The cleaned samples

840 were then washed twice with 10 ml of ice-cold buffer B (10mM HEPES pH8.0, 200mM  
841 NaCl, 1mM EDTA pH8.0, 0.5mM EGTA pH8.0, 0.01% Triton X-100, filtered) plus  
842 protease inhibitors (same as in buffer A), 10 minutes each at 4°C with rotation. The  
843 target leg discs were then removed from the samples in ice-cold buffer B with protease  
844 inhibitors, and were transferred to a 1.5 ml tube placed on ice containing 0.5 ml of ice-  
845 cold buffer B with protease inhibitors. The samples were again kept cold as much as  
846 possible. Once all discs were dissected, they were transferred to a 15 ml falcon tube.  
847 After the discs settle to the bottom, the supernatant was removed, and 0.9 ml of buffer  
848 C (10mM HEPES pH8.0, 1mM EDTA pH8.0, 0.5mM EGTA pH8.0, 1% Triton X-100,  
849 filtered) plus protease inhibitors (Halt™ Protease Inhibitor Cocktail, EDTA-Free (100X),  
850 ThermoFisher 87785) was added. Next, the samples were sonicated in the 15 ml falcon  
851 tube in ice water bath using Branson Sonifier 450, at 15% amplitude for 12 minutes, 15  
852 seconds on/30 seconds off. After sonication, the 15 ml tube was briefly spun to collect  
853 all sample to the bottom, and the entire sample was transferred to a 1.5 ml tube. The  
854 chromatin sample was then centrifuged in a refrigerated table top centrifuge at the max  
855 speed at 4°C for 10 minutes to remove any insoluble materials, and 850 µl of the  
856 supernatant was transferred to a new 1.5 ml tube. The chromatin may be used  
857 immediately for ChIP, or could be flash frozen in liquid nitrogen, and stored at -80°C for  
858 at least a few weeks. Generally, about 1 to 1.5 µg of chromatin could be expected from  
859 about 200 leg discs.

## 860 ChIP

861 The following antibodies were used in the ChIP experiments performed in this study.  
862 Monoclonal mouse anti-FLAG M2 (Sigma F1804, 10µg per ChIP), guinea pig anti-Dll<sup>53</sup>  
863 (5µl per ChIP), goat anti-Hth (Santa Cruz sc-26187, lot A1204, 3µg per ChIP) and rabbit  
864 anti-CBP (a gift from Mattias Mannervik, 5ul per ChIP, preabsorbed using wild type  
865 embryos). Normal mouse IgG (Santa Cruz Biotechnology, sc-2025), normal guinea pig  
866 IgG (Santa Cruz Biotechnology, sc-2711) and normal rabbit IgG (Santa Cruz  
867 Biotechnology, sc-2027, or Thermo Fisher Scientific, 10500C) were used in preclearing  
868 of the samples.



869 The ChIP protocol used in this study was derived from 2 previously published  
870 procedures<sup>56,57</sup>. All buffers were pre-chilled on ice before use, and the samples were  
871 kept cold for as much as possible during all handling steps.

872 Day 1: 1/4 volume of 5x chromatin dilution buffer (50mM Tris-HCl pH8.0, 5mM EDTA  
873 pH8.0, 750mM NaCl, 1% Triton X-100, filtered) was added to each chromatin sample to  
874 adjust buffer condition, and appropriate volume of Halt™ Protease Inhibitor Cocktail,  
875 EDTA-Free (100X) was then added to each sample. Next, 10 µg of normal IgG from the  
876 same host species as the ChIP antibody was added to each chromatin sample to pre-  
877 clear the samples. The sample was then rotated at 4°C for 1 hour. In the meantime, the  
878 protein G agarose beads (Roche 11243233001) were prepared. 40 µl of the beads  
879 suspension (settled beads volume 20 µl) were used for each ChIP reaction, and the  
880 same amount was used for each preclearing reaction. The appropriate volume of beads  
881 was washed twice with 1 ml of RIPA buffer (10mM Tris-HCl pH8.0, 1mM EDTA pH8.0,  
882 150mM NaCl, 1% Triton X-100, filtered), 10 minutes each at 4°C with rotation. To each  
883 aliquot of beads for ChIP reactions, add 12.5µl of 100 mg/ml BSA (Sigma A2153) and  
884 25 µl of 10 mg/ml tRNA (Roche 10109517001), and rotate at 4°C overnight to block.  
885 Add the chromatin samples to the aliquots of beads for preclearing, and rotate at 4°C for  
886 1 hour. The samples were then spun at the max speed at 4°C for 10 minutes. Most of  
887 the supernatant was transferred to new 1.5 ml tubes, and about 130 µl was left in the  
888 old tubes. To each precleared chromatin sample in the new tube, add 12.5µl of 100  
889 mg/ml BSA, 25 µl of 10 mg/ml tRNA, and appropriate amount of ChIP antibody, and  
890 rotate at 4°C overnight. From each leftover chromatin sample in the old tube, take 100  
891 µl and store at -80°C as input.

892 Day 2: The blocked beads were separated from supernatant by spinning, and the  
893 supernatant was discarded. The chromatin samples were added to the beads, and the  
894 samples were then rotated at 4°C for 3 hours. Next, the beads were rinsed with 1 ml of  
895 RIPA buffer, followed by 2 washes with RIPA buffer, 1 wash with high salt RIPA buffer  
896 (10mM Tris-HCl pH8.0, 1mM EDTA pH8.0, 350mM NaCl, 1% Triton X-100, filtered), 1  
897 wash with LiCl buffer (10mM Tris-HCl pH8.0, 1mM EDTA pH8.0, 250mM LiCl, 0.1%  
898 IGEPAL CA-630, filtered), and 1 wash with TE buffer (10mM Tris-HCl, 1mM EDTA,

899 pH8.0, filtered). Each wash was done with 1 ml of buffer at 4°C with rotation for 10  
900 minutes. After the TE wash, resuspend the beads with 500 µl of TE. The input samples  
901 were also adjusted to 500 µl with TE buffer. Next, to all beads and input samples, add  
902 5µl of 5M NaCl, 12.5 µl of 20% SDS, and 10 µl of 1mg/ml RNase (Sigma R5503), and  
903 incubate at 37°C for 30 minutes with rotation. 20µl of 20mg/ml proteinase K (Roche  
904 03115836001) was then added to each sample. The samples were incubated at 55°C  
905 for 2 to 3 hours with rotation, followed by rotation at 65°C overnight to decrosslink. The  
906 37°C, 55°C and 65°C incubation steps were all done in a hybridization oven, and to  
907 avoid leaking of samples, DNA LoBind Safe lock tubes (Eppendorf 022431021) were  
908 used.

909 Day 3: The ChIP samples were centrifuged at max speed at room temperature for 1  
910 minute, and the supernatant was transferred to new tubes. 100 µl of 3M sodium acetate  
911 (pH 5.2) was added to each sample (ChIP and input), and the samples were extracted  
912 with phenol:chloroform (1:1) and then with chloroform. 1 µl of 20mg/ml glycogen (Roche  
913 10901393001) was then added to each sample, and DNA in the samples was purified  
914 by isopropanol precipitation. The DNA pellet was dissolved with 30 µl of 10mM Tris  
915 buffer, pH8.0. Finally, 5 µl of each ChIP sample and 5 µl of each 1:10 input sample  
916 were used to quantify the amount of purified DNA using Qubit fluorometer with Qubit  
917 dsDNA HS Assay Kit (Thermo Fisher Scientific Q32854). After sacrificing some input  
918 and ChIP samples for quantification, the amount of DNA left for library preparation was  
919 generally the following: about 10 ng for input samples and about 1.5 ng for ChIP  
920 samples.

### 921 ChIP-seq library preparation

922 ChIP-seq libraries were prepared using the TruSeq ChIP Library Preparation Kits  
923 (illumina IP-202-1012 and IP-202-1024), following manufacturer's instructions. About 8  
924 to 10 ng of DNA (or the entire samples if there was less than this amount for some ChIP  
925 samples) was used as the starting materials, 16 cycles of PCR amplification was  
926 performed for all libraries. The libraries were first quantified using nanodrop, and  
927 appropriate dilutions were made for accurate quantification and size determination. The  
928 libraries were then quantified with Qubit fluorometer with Qubit dsDNA HS Assay Kit



929 (Thermo Fisher Scientific Q32854), and the library sizes were determined by  
930 bioanalyzer, using Bioanalyzer High Sensitivity DNA Analysis (Agilent 5067-4626).

### 931 ATAC-seq library preparation

932 The ATAC-seq library preparation procedure was modified from <sup>17</sup>. *3xFLAG-Scr*  
933 wondering larvae were dissected in PBS + 1% BSA on ice for T1 or T3 leg discs. BSA  
934 was added to prevent the discs from sticking to plasticware. The discs were  
935 resuspended in nuclear extraction buffer (NEB, 10mM HEPES pH 7.5, 2.5mM MgCl<sub>2</sub>,  
936 10mM KCl) and placed in a 1mL dounce homogenizer (Wheaton 357538) on ice. The  
937 discs were homogenized with 15 strokes by the loose pestle, followed by a 10-minute  
938 incubation on ice, then with 20 strokes by the tight pestle. The dissociated nuclei were  
939 counted using a hemocytometer, and 50,000 nuclei were transferred to a 1.5ml tube  
940 containing 1mL of NEB + 0.1% Tween-20. The sample was briefly mixed, and then  
941 immediately spun at 1000g at 4°C for 10 minutes to pellet the nuclei. The transposition  
942 reaction was performed using the Nextera DNA Library Preparation Kit (illumina FC-  
943 121-1030). The supernatant was removed and the pellet was resuspended in 50 µl of  
944 freshly prepared ATAC transposition solution (1xTD buffer (2xTD is supplied in the  
945 illumina kit), 0.1% Tween-20, 0.01% digitonin, 1/20 volume of the Tn5 transposase  
946 (supplied in the illumina kit)). The transposition reaction was performed on a  
947 thermomixer at 1000 rpm at 37°C for 30 minutes, and the DNA was purified using the  
948 MinElute PCR Purification Kit (Qiagen 28006). The DNA was eluted with 2x11µl of the  
949 elution buffer, and 20µl of eluted DNA was used for PCR amplification. The number of  
950 PCR cycles was determined according to <sup>17</sup>. Library DNA was size selected and purified  
951 using the AMPure XP beads (Beckman Coulter A63881). Two-sided size selection  
952 using 0.55 volume and 1.65 volumes of the beads was performed, and 21µl of nuclease  
953 free water was used to elute the library DNA.

### 954 Generation of protein expression constructs

955 pET9a-Exd expresses untagged full length Exd and pET14b-Hth<sup>HM</sup> expresses the HM  
956 isoform of Hth with N terminal 6xHistag, and these vectors were described before <sup>8</sup>. The  
957 pET21a-T7-DII-his vector expresses full length DII-PB isoform with N terminal T7 tag  
958 and C terminal 6xHis tag, and was described in <sup>58</sup>.

959 The following protein expression vectors were generated in this study: pQE30-EGFP,  
960 pQE30-mCherry, pQE30-EGFP-Scr-FLAG, and pET9a-Exd-T7. All cloning steps  
961 involving pQE30 backbone require the host cells to express high levels of the lacI  
962 protein, and were performed using 5-alpha F' I<sup>q</sup> cells (NEB C2992H).

963 The EGFP fragment was amplified using primers EGFP-5' and EGFP-3', and the TEV-  
964 MCS fragment, which had KpnI and Sall overhangs, was generated by annealing oligos  
965 TEV-MCS-5' and TEV-MCS-3'. The TEV-MCS fragment and BamHI + KpnI digested  
966 EGFP fragment was ligated into BamHI + Sall digested pQE30 vector (Qiagen) in a 3-  
967 fragment ligation reaction, generating pQE30-EGFP. The pQE30-mCherry construct  
968 was generated by replacing the BamHI-AvrII EGFP fragment by the BamHI-AvrII  
969 mCherry fragment, which was PCR amplified using primers mCherry-5' and mCherry-3',  
970 followed by BamHI + AvrII digestion. The full length Scr ORF was amplified using  
971 primers Scr-FL-5' and Scr-FL-3' (which has the FLAG encoding sequence), digested  
972 with SpeI + AscI, and ligated into SpeI + AscI digested pQE30-EGFP to generate  
973 pQE30-EGFP-Scr-FLAG.

974 The Exd-T7 fragment was PCR amplified using pET9a-Exd as the template and T7-  
975 promoter and Exd-T7-3' as the primers. This fragment was digested with NdeI + BamHI,  
976 and was used to replace the NdeI-BamHI Exd fragment of pET9a-Exd to generate  
977 pET9a-Exd-T7.

978 The pQE30 based expression constructs were used to transform the M15 E. coli cells  
979 (Qiagen) to generate the protein expression strains. pET9a-Exd-T7 and pET14b-Hth<sup>HM</sup>  
980 were used to co-transform BL21(DE3) cells to generate the strain that expresses Exd-  
981 T7 (with Hth<sup>HM</sup>).

## 982 Recombinant protein expression and purification

983 5ml of LB medium with appropriate antibiotics was inoculated with the protein  
984 expression strain, and the culture was shaken at 37°C overnight. In the next morning,  
985 1ml of overnight culture was used to inoculate 150ml of fresh LB medium with  
986 appropriate antibiotics. The culture was shaken at 37°C until OD<sub>600</sub> reached about 0.7.

987 IPTG was added to a final concentration of 1mM, and the culture was shaken for  
988 another 5 to 6 hours at 37°C before harvesting the cells.

989 The cells were resuspended in 8ml of Lysis/wash buffer (50mM Tris pH 7.5, 500mM  
990 NaCl, 20mM Imidazole) with proteinase inhibitor cocktail (Roche 11836170001), and  
991 sonicated to lyse the cells. The samples were centrifuged at 4°C at 10000rpm for 30  
992 minutes. The supernatant was loaded onto Ni-NTA agarose beads (Qiagen 30210)  
993 rinsed with lysis/wash buffer. Binding was performed at 4°C for 2 hours with rotation.  
994 The beads were washed 3 times with lysis/wash buffer, and each wash was performed  
995 at 4°C for 5 minutes. Elution was performed at room temperature with 125ul of elution  
996 buffer (lysis/wash buffer supplied with 300mM imidazole and proteinase inhibitor  
997 cocktail) for 10 minutes, and the elution was repeated once. The eluates were pooled,  
998 and dialyzed at 4°C overnight with dialysis buffer (20mM HEPES pH 8.0, 200mM NaCl,  
999 10% Glycerol, 2mM MgCl<sub>2</sub>) using Slide-A-Lyzer Dialysis cassette (Thermo Scientific  
1000 66383). 0.05% was included in all buffers when purifying DII. The protein samples were  
1001 quantified with Bradford assay (Biorad 500-0006) using BSA as the standard, and were  
1002 analyzed on SDS-PAGE.

1003 The following is a list of proteins used in the figure panels. **Fig 5e:** EGFP-Scr-FLAG and  
1004 T7-DII. **Fig. 7a-d:** EGFP-Scr-FLAG, T7-DII and Exd-T7 (with Hth<sup>HM</sup>). **Fig. 7f:** EGFP-Scr-  
1005 FLAG and Exd-T7 (with Hth<sup>HM</sup>). **Fig. 7h:** EGFP-Scr-FLAG, T7-DII and mCherry.

#### 1006 Gel-free Selex

1007 To make the R0 Selex library, 10ul of 10x STE buffer (100mM Tris pH8.0, 10mM EDTA  
1008 pH8.0, 1M NaCl), 10ul of 100uM Selex library oligo, 20ul of 100uM Selex-R primer, and  
1009 60ul H<sub>2</sub>O were mixed. The mixture was denatured by boiling for 10 minutes, and cooled  
1010 to room temperature slowly to anneal the primer to the library oligo. Klenow reaction  
1011 was used to generated the double stranded library DNA. 25ul of 10x NEBuffer 2, 20ul of  
1012 10mM dNTP, 80ul H<sub>2</sub>O, and 25ul Klenow fragment (NEB M0210L) were then added to  
1013 the sample, and the sample was incubated at room temperature 30 minutes. 10ul of  
1014 0.5M EDTA, pH8.0 was used to stop the reaction, and the sample was divided into 5  
1015 parts and each part was purified using one PCR purification columns (PCR purification

1016 kit, Qiagen 28106). 50ul elution buffer was used the elute each column, and the eluates  
1017 were pooled.

1018 16mer R0 libraries were used for all monomer Selex experiments, and 24mer libraries  
1019 were used for all dimer Selex experiments. The 50ul Selex reaction samples were  
1020 assembled by mixing 25ul of protein mixture and 25ul of the DNA library mixture. The  
1021 DNA library mixture contained 10ul of 5x binding buffer (50mM Tris-HCl pH7.5, 250mM  
1022 NaCl, 5mM MgCl<sub>2</sub>, 20% glycerol, 2.5mM DTT, 2.5mM EDTA, ~125ng/ul polydIdC  
1023 (Sigma P4929-10UN), 100ng/ul BSA), 7.5ul H<sub>2</sub>O, and 7.5ul of 3.3uM dsDNA library, and  
1024 the protein mixture was generated by mixing appropriate volumes of 1uM proteins and  
1025 adjusted to 25ul with dialysis buffer. 0.05% Tween-20 was included when Dll was used  
1026 in the reactions. The DNA library mixture and the protein mixture were combined and  
1027 incubate at room temperature for 30 minutes. In the final 50ul sample, the dsDNA library  
1028 was at a concentration of 500nM, and the protein concentrations were: 100nM for Scr  
1029 and Ubx, 50nM for Dll and 200nM for Exd (with Hth<sup>HM</sup>).

1030 30ul of Dynabeads™ Protein G (Thermo Fisher 10004D) was rinsed once with 200ul of  
1031 wash buffer (10mM Tris-HCl, pH7.5, 150mM NaCl, 1mM MgCl<sub>2</sub>, 0.5mM EDTA, pH 8.0,  
1032 0.5mM DTT, 20ng/ul BSA), and blocked with 500ul of blocking buffer (500ul wash buffer  
1033 + 5ul of 100mg/ml BSA + 10ul of 10mg/ml yeast tRNA) for 10 minutes at room  
1034 temperature with rotation. Then 3ug of the mouse anti-FLAG M2 antibody (Sigma  
1035 F1804) or 2ug of mouse anti-T7 antibody (Millipore Sigma 69522) were added to the  
1036 dynabeads in blocking solution, and continue to rotate at room temperature for at least  
1037 30 minutes to let the antibody bind to the beads.

1038 For monomer Selex, the dynabeads with bound antibody were separated from the  
1039 supernatant and were rinsed twice with wash buffer. To perform a rinse, add 1ml of the  
1040 wash buffer to the tube, and invert the tube a few times. The Selex samples were then  
1041 applied to the dynabeads and incubated at room temperature for 20 minutes, with  
1042 occasional mixing by pipetting. The beads were rinsed 3 times with wash buffer.

1043 For dimer Selex, the FLAG tagged protein was always pulled down the first. The  
1044 dynabeads with bound M2 antibody were separated from the supernatant and were  
1045 rinsed twice with wash buffer. Next, the samples were applied to the dynabeads and

1046 incubated at room temperature for 20 minutes, with occasional mixing by pipetting. The  
1047 beads were rinsed 3 times with wash buffer. 100ul of FLAG elution buffer (500ng/ul  
1048 3xFLAG peptide in wash buffer) was used to competitively elute bound protein-DNA  
1049 complexes for 10 minutes at room temperature with occasional pipetting to mix.

1050 The dynabeads with bound anti-T7 antibody were magnetically separated from the  
1051 supernatant, and were rinsed twice with wash buffer. The eluate was also magnetically  
1052 separated from the beads, and loaded to the anti-T7 antibody conjugated dynabeads for  
1053 the second pull-down. The samples were incubated at room temperature for 20 minutes  
1054 with occasional mixing by pipetting. The beads were then rinsed 3 times, and all  
1055 supernatant removed after magnetic separation.

1056 To purify bound DNA, 500ul of wash buffer was used to resuspend the beads, and 25ul  
1057 of 20%SDS and 100ul of 3M sodium acetate, pH5.2 were added. Next, the sample was  
1058 extracted with phenol:chloroform and then with chloroform. 1ul of 20mg/ml glycogen  
1059 was added to the sample, and the DNA was purified by isopropanol precipitation. The  
1060 DNA pellet was then dissolved with 25ul of 10mM Tris-HCl, pH8.0. Finally, 5ul of the  
1061 DNA was used to measure the DNA concentration using Qubit fluorometer with Qubit  
1062 dsDNA HS Assay Kit (Thermo Fisher Scientific Q32854).

### 1063 Generation of sequencing libraries from purified Selex DNA

1064 The sequencing libraries were generated by PCR using Phusion DNA polymerase (NEB  
1065 M0530S, or Thermo F530L). The 50ul PCR reaction was assembled by mixing 10ul of  
1066 5xHF buffer, 1ul of 10mM dNTP, 5ul of purified Selex DNA (for R0, 1:5000 dilution was  
1067 used), 1ul of 0.5uM Selex-for primer and 0.5uM Selex-rev primer, 5ul of 10uM NEB  
1068 universal primer and 10uM NEB index primer (in NEBNext Multiplex Oligos for Illumina,  
1069 NEB E7335, E7500), 0.5ul of Phusion DNA polymerase and 21.5ul H<sub>2</sub>O. The 8 different  
1070 Selex-for primers were designed to increase complexity by sequencing different libraries  
1071 at different paces. The following program was used for PCR: 1 cycle of 98°C for 30  
1072 seconds, 5 cycles of 98°C for 10 seconds, 60°C for 30 seconds and 72°C for 15  
1073 seconds, 14 cycles of 98°C for 10 seconds and 65°C for 75 seconds, 1 cycle of 65°C for  
1074 5 minutes, and holding at 4°C. The PCR products were purified using 75ul (1.5 volume)  
1075 of AMPure XP beads (Beckman Coulter A63881), and eluted with 15ul of Qiagen EB

1076 buffer. The sequencing libraries were analyzed using Bioanalyzer High Sensitivity DNA  
1077 Analysis (Agilent 5067-4626) and were quantified using Qubit dsDNA HS Assay Kit  
1078 (Thermo Fisher Scientific Q32854).

#### 1079 High throughput sequencing

1080 All high throughput sequencing was performed using illumina Nextseq 500 sequencer,  
1081 combined with NextSeq 500/550 High Output Kit v2 (75 Cycles) (illumina FC-404-2005).  
1082 The individual libraries were normalized to 4nM and pooled, and then denatured,  
1083 neutralized and diluted according to the illumina NextSeq System Denature and Dilute  
1084 Libraries Guide before sequencing. The phiX (illumina FC-110-3001) control library was  
1085 always used as an internal control according to the illumina NextSeq System Denature  
1086 and Dilute Libraries Guide.

#### 1087 Bioinformatics

1088 4 separate FASTQ files were obtained for each library, each coming from one lane of  
1089 the sequencing run. The 4 FASTQ files of the same library were first concatenated to  
1090 generate a single FASTQ file, before any further analysis. Mapping of the reads were  
1091 performed using the galaxy version of bowtie (“Map with Bowtie for Illumina” on  
1092 usegalaxy.org)<sup>59</sup> against the fly genome build dm3, with the parameter -m 1, which  
1093 means only uniquely mapped reads were kept, and if a read could be mapped to  
1094 multiple genome loci, it would be suppressed. The resulting SAM files were then filtered  
1095 (using the “Filter SAM or BAM, output SAM or BAM” function on usegalaxy.org) to  
1096 remove unmapped reads. After mapping and filtering, only uniquely mapped reads were  
1097 kept. ChIP-seq peak calling was performed using the galaxy version of MACS2  
1098 (“MACS2 callpeak” on usegalaxy.org)<sup>60</sup>, with the following setting: --nomodel --extsize  
1099 200, and all other parameters were default. ATAC-seq peak calling was also performed  
1100 with the galaxy version of MACS2, with the following setting: --nomodel --extsize 200 --  
1101 shift -100.

1102 To perform peak analyses and motif searches, the bed files containing called peaks  
1103 were first filtered to remove peaks in heterochromatic regions and those mapped to  
1104 chrU and chrUextra. The remaining peaks were assigned to genes and different



1105 genomic locations (introns, promoters etc.) using homer V4.10<sup>61</sup> according to genome  
1106 build dm3, and the pie graphs were generated using Microsoft Excel. *de novo* motif  
1107 searches were also performed with homer V4.10 using peaks located in intergenic and  
1108 intronic regions, with the following parameters: dm3 -size 80 -len 8 -mis 1 -mask.

1109 Differential binding analyses were performed using DiffBind<sup>62</sup>, with the following  
1110 parameters: AnalysisMethod=DBA\_EDGER, summits=250, minMembers=2. 2 biological  
1111 replicates of each condition to be compared (in total 4 ChIP-seq experiments) were fed  
1112 into DiffBind, and each biological replicate consisted of both ChIP and input samples.  
1113 Differential loci were defined as loci being called as peaks by MACS2 in at least 2 out of  
1114 4 ChIP experiments (minOverlap=2), and having an FDR<0.05. Common loci were  
1115 defined as loci being called as peaks by MACS2 in at least 3 out of 4 ChIP experiments  
1116 (minOverlap=3), and having a p value>0.1. “and/or” loci (for example “all Scr<sub>T1</sub> and/or  
1117 Ub<sub>X<sub>T3</sub></sub> loci” and “all ATAC<sub>T1</sub> and/or ATAC<sub>T3</sub> loci” in **Extended Data Fig. 4**) were defined  
1118 as all loci being called as peaks by MACS2 in at least 2 out of 4 ChIP or ATAC  
1119 experiments. Loci in heterochromatic regions, as well as loci mapped to chrU and  
1120 chrUextra were removed before performing further analyses.

1121 Differentially accessible loci were obtained in two steps. First, DiffBind was used to find  
1122 putative differentially accessible loci with the following parameters:  
1123 AnalysisMethod=DBA\_EDGER, summits=250, minMembers=2, FDR<0.05. Second,  
1124 from all loci obtained in step 1, those with  $|\log_2(\text{Fold})|>1$  were reported as differentially  
1125 accessible loci in Supplemental Table 1.

1126 To sort all 432 Scr<sub>T1</sub>>Ub<sub>X<sub>T3</sub></sub> peaks according to their Exd-dependency, we compared  
1127 Scr<sub>T1</sub> and Scr(YPWM\*)<sub>T1</sub> ChIP results at these loci using DiffBind. According to the  
1128  $\log_2[\text{fold}]$  values determined by DiffBind, all loci were first divided into those with  
1129 Scr<sub>T1</sub>>Scr(YPWM\*)<sub>T1</sub> occupancy, and those with Scr<sub>T1</sub><Scr(YPWM\*)<sub>T1</sub> occupancy. The  
1130 former class was then sorted by FDR in an ascending order, and the latter class sorted  
1131 by FDR in a descending order. The two FDR-sorted classes were then concatenated to  
1132 obtain the final peak set, which we interpreted as sorted according to Exd-dependency.

1133 To identify Exd-dependent and -independent peaks among all 432 Scr<sub>T1</sub>>Ub<sub>X<sub>T3</sub></sub> peaks,  
1134 we manually correlated these 432 peaks with peaks reported in Fig 4d. The 432 peaks



1135 were sorted according to their Exd-dependency determined by FDR values reported by  
1136 DiffBind. Peak 141 is the last  $Scr_{T1} > Ubx_{T3}$  peak that overlaps with a peak in the  
1137  $Scr_{T1} > Scr(YPWM^*)_{T1}$  class (667 in total) we defined in Fig 4d. Similarly, peak 261 is the  
1138 first  $Scr_{T1} > Ubx_{T3}$  peak that overlaps with a peak in the  $Scr_{T1} \approx Scr(YPWM^*)_{T1}$  class  
1139 (3338 in total). Therefore, peaks 1-141 were defined as Exd-dependent  $Scr_{T1} > Ubx_{T3}$   
1140 peaks, and 261-432 as Exd-independent  $Scr_{T1} > Ubx_{T3}$  peaks.

1141

#### 1142 NRLB analysis

1143 The dm3 genome was analyzed for Scr and Ubx monomer motifs and Scr-Exd and Ubx-  
1144 Exd dimer motifs using the PSAMs from the R package NRLBtools<sup>18</sup>. Custom code was  
1145 used to compute relative affinities at every offset in the genome with these models, with  
1146 the affinities summed across both strands at every position and normalized to the  
1147 genomic maximum. Normalized relative affinities less than  $10^{-4}$  were ignored for further  
1148 analysis. To smooth out significant position-specific local variations, the remaining  
1149 affinities were used to construct a windowed maximum across the genome: for every  
1150 window of length k in the genome, the maximum affinity found within that window was  
1151 used. Here, k is the length of the PSAM used. These windowed affinities were then  
1152 stored as bigwig files, effectively converting them to 'affinity tracks' to facilitate further  
1153 downstream analyses. Ubx1a and Ubx1Va are two Ubx isoforms, and monomer and  
1154 Exd- dimer models for both isoforms are available in the NRLBtools package. Both  
1155 isoforms were used in the analyses and gave similar global patterns, and Ubx1a results  
1156 were shown throughout this study to represent Ubx.

1157 New NRLB models from gel free SELEX data were constructed on the monomer and  
1158 dimer data using the multi-mode modeling strategy with growth outlined in<sup>18</sup>. For  
1159 models fit to the monomer data, two modes were used with starting k=7 and grown to  
1160 k=13, while models fit to the dimer data used three modes with starting k=16 grown to  
1161 k=18. In both cases, shift symmetries of length 1 and flank lengths between 0-3 were  
1162 tested, and dinucleotide parameters were added at the end. As the length of the  
1163 variable region in the monomer data was 16bp, an R0k of 6bp was used, while the  
1164 dimer data used an R0k of 5bp as the variable region was 24bp. Of the various models

1165 generated for every dataset, the one with the highest likelihood was selected and one  
1166 mode was selected and displayed in Fig. 7.

### 1167 Data visualization

1168 Bigwig files from MACS2 peak calling were loaded into the genome browser IGV<sup>63</sup> and  
1169 visually analyzed. Tracks covering selected regions (for example, the enhancers  
1170 selected to generate reporters) were taken as screen snapshots.

1171 Heatmaps and histograms were generated using the galaxy version of deepTools3<sup>64</sup>  
1172 with `-binSize=20`, and the colors of histogram lines were changed with Adobe Illustrator  
1173 when necessary. Bed files used in generating the heatmaps were from differential  
1174 binding analyses described above, and the bigwig files used were from MACS2 peak  
1175 calling of ChIP-seq and ATAC-seq data, or generated from genome wide NRLB  
1176 analysis described above. Scr<sub>T1</sub> and Ubx<sub>T3</sub> ChIP datasets were normalized with a  
1177 scaling factor such that the average Scr<sub>T1</sub> ChIP signal and average Ubx<sub>T3</sub> ChIP signal  
1178 were the same at the peak center for Scr<sub>T1</sub>≈Ubx<sub>T3</sub> loci. A similar scaling factor was  
1179 computed to normalize Scr(WT) and Scr(YPWM\*) ChIP datasets, as well as Dll<sub>T1</sub> and  
1180 Dll<sub>T3</sub> ChIP datasets. No scaling factors were applied to NRLB scores, and the scores  
1181 reflect normalized relative affinity of each binding mode.

1182 Pearson's Correlation Coefficient (PCC) was computed using the R function `cor.test`. All  
1183 scatter plots and density plots were generated in R in 2 steps. First, for each locus of  
1184 interest, the scores for ChIP-seq signals, ATAC-seq signals, or NRLB signals were  
1185 extracted from corresponding bigwig files. To extract a score of a locus, the signal score  
1186 of each base pair of a 100bp interval flanking the peak center (from 50bp upstream to  
1187 50bp downstream) was extracted using R functions, and the sum of the 100 base pair  
1188 scores were defined as the score of the locus. For ChIP-seq scores, the same scaling  
1189 factors used for heatmaps were also applied to normalize different ChIP datasets.  
1190 Second, the plots were generated using the R package `ggplot2`.

1191 For the plots showing Scr-Exd and Ubx-Exd scores across wild type and mutant  
1192 enhancers, each sequence was first analyzed using the R package `NRLBtools`<sup>18</sup>, and a  
1193 table containing the position and affinity information of 10 strongest motifs of each dimer

1194 was then generated. Again, the Ubxla-Exd score was used to represent Ubx-Exd  
1195 affinity, and all relative affinity scores were normalized to the genome max. The final  
1196 plots were then generated from the tables using the R package ggplot2.

#### 1197 RNA-seq and data processing

1198 Imaginal discs were dissected from isogenic *w<sup>1118</sup>* (Bloomington #5905) wandering  
1199 larvae. For each biological replicate, 40 leg discs were dissected. Larvae of mixed  
1200 sexes were used. The selected larvae were dissected in PBS + 1%BSA (filtered), and  
1201 the samples were kept cold for as much as possible during dissection. The dissected  
1202 discs were transferred with a P-20 pipette to a 1.5 ml tube containing 350 ul of the RLT  
1203 buffer (in RNeasy mini kit, Qiagen 74104) with 1%  $\beta$ - mercaptoethanol, and the discs  
1204 were immediately homogenized with a plastic pestle. The homogenized samples might  
1205 be kept at -20°C for a few days. PBS was added to each sample to make the total  
1206 volume 450 ul, and 250 ul of pure ethanol was added. The entire samples were mixed  
1207 well and loaded on RNeasy mini columns. After washing once with 700 ul of RW1, and  
1208 twice with 500 ul of RPE, the RNA was eluted twice with 45 ul of nuclease free water,  
1209 resulting in 90 ul of eluate.

1210 The RNA was then treated with DNase I (NEB M0303S) to remove trace amount of  
1211 genomic DNA. 10 ul of the 10x DNase I buffer was added to each sample, and the  
1212 samples were mixed. 2 ul of DNase I was then added to each sample. The samples  
1213 were mixed well and incubated in 37°C water bath for 30 minutes. The RNA was then  
1214 cleaned up using the RNeasy micro kit (Qiagen 74004). To each sample, 350 ul of the  
1215 RLT buffer with 1%  $\beta$ - mercaptoethanol and 250 ul of pure ethanol were added. The  
1216 samples were mixed well and loaded on RNeasy MinElute Spin Columns. After washing  
1217 once with 700 ul of RW1, once with 500 ul of RPE, and once with 500 ul of 80% ethanol  
1218 according to manufacturer's standard protocol, the RNA was eluted with 15 ul of  
1219 nuclease free water. The RNA samples were quantified with nanodrop, and appropriate  
1220 dilutions were run on bioanalyzer with Agilent RNA 6000 Pico Kit (Agilent 5067-1513) to  
1221 ensure the RNA samples had high integrity.

1222 RNA-seq libraries were prepared using the NEBNext Ultra II Directional RNA Library  
1223 Prep Kit for Illumina (NEB E7760S), following the manufacturer's instructions, with the

1224 following custom parameters. 50 ng of total RNA was used as starting materials, and 14  
1225 cycles of PCR amplification was performed. AMPure XP beads (Beckman Coulter  
1226 A63881) were used in size selection, and the target mean library size was 520bp (mean  
1227 insert size about 400bp). 22 ul of beads was added in the first bead selection, and 10 ul  
1228 was added in the second bead selection. In the last step, the library DNA was eluted  
1229 with 17 ul of 0.1xTE buffer, instead of 23 ul stated in the kit's manual, and 15 ul was  
1230 transferred to 1.5 ml tubes. The libraries were first quantified with nanodrop, and  
1231 according to the nanodrop readings, appropriate dilutions were made for Qubit  
1232 quantification and bioanalyzer analysis. The dilutions were accurately quantified using  
1233 Qubit fluorometer with Qubit dsDNA HS Assay Kit (Thermo Fisher Scientific Q32854),  
1234 and the library sizes were determined by bioanalyzer, using Bioanalyzer High Sensitivity  
1235 DNA Analysis (Agilent 5067-4626). Finally, the libraries were adjusted to 4nM each and  
1236 pooled for sequencing with the illumina Nextseq 550 sequencer.

1237 The fastq files were processed using tools on usegalaxy.eu. The Cutadapt tool was  
1238 used to trim adaptor sequences from the reads (-a  
1239 AGATCGGAAGAGCACACGTCTGAACTCCAGTCAC -A  
1240 AGATCGGAAGAGCGTCGTGTAGGGAAAGAGTGTAGATCTCGGTGGTCGCCGTATC  
1241 ATT), and to filter out reads shorter than 100bp (-minimum-length 100). The filtered  
1242 reads were then mapped to the genome build dm6 using the RNA STAR tool with the  
1243 following parameters: --sjdbOverhang 149. The featurecount tool was used to obtain the  
1244 transcript count tables, and the R package DESeq2 was used to identify differentially  
1245 expressed genes.

#### 1246 Co-immunoprecipitation (co-IP)

1247 The protein mixture was set up by mixing 20ul of dialysis buffer with 0.05% Tween-20,  
1248 2.5ul of 1uM T7-DII and 2.5ul of 1uM EGFP-Scr-FLAG. 10ul of 5x conditioning buffer  
1249 (50mM Tris-HCl pH7.5, 250mM NaCl, 5mM MgCl<sub>2</sub>, 2.5mM DTT, 2.5mM EDTA,  
1250 100ng/ul BSA, 0.025% Tween-20) was mixed with 15ul of H<sub>2</sub>O, and the entire 25ul  
1251 buffer was added to the protein mixture to set up the co-IP binding. The binding was  
1252 performed at room temperature for 30 minutes.

1253 30ul of Dynabeads™ Protein G (Thermo Fisher 10004D) per binding reaction was  
1254 rinsed once with wash buffer (10mM Tris-HCl, pH7.5, 150mM NaCl, 1mM MgCl<sub>2</sub>, 0.5mM  
1255 EDTA, pH 8.0, 0.5mM DTT, 20ng/ul BSA, 0.05% Tween-20), and blocked with blocking  
1256 buffer (1ml wash buffer + 10ul of 100mg/ml BSA + 20ul of 10mg/ml yeast tRNA) for 10  
1257 minutes at room temperature with rotation. 3ug of mouse anti-FLAG M2 antibody  
1258 (Sigma F1804) per co-IP reaction was added to the beads, and continue to rotate at  
1259 room temperature for at least 30 minutes to let the antibody bind to the beads.

1260 The dynabeads with bound antibody were separated from the supernatant and were  
1261 rinsed twice with wash buffer. The co-IP samples were then applied to the dynabeads  
1262 and incubated at room temperature for 20 minutes, with occasional mixing by pipetting.  
1263 The beads were then washed 3 times with wash buffer. During the last wash, the  
1264 samples were transferred to a new tube and the supernatant was removed. 100ul of 4x  
1265 SDS-PAGE sample buffer (with 10% β-mercaptoethanol) was used to resuspend the  
1266 beads. The samples were heated at 95°C for 5 minutes, and the supernatant was  
1267 loaded on SDS-PAGE. The proteins were transferred to PVDF membrane using routine  
1268 protocol, and the membrane was blotted with 1:5000 HRP conjugated anti-T7 antibody  
1269 (Millipore Sigma 69048). SuperSignal™ West Femto Maximum Sensitivity Substrate  
1270 (Thermo Fisher 34095) was used to visualize the target protein.

#### 1271 *in vitro* pull-down using biotin labeled DNA probes

1272 The biotin labeled DNA probes were generated by annealing a primer with 5' biotin label  
1273 to the probes that have the primer binding site at their 3' end, followed by Klenow  
1274 mediated primer extension. 4ul of 10x STE buffer (see above), 30ul H<sub>2</sub>O, 4ul of 10uM  
1275 biotin-SR1 primer and 2ul of 10uM probe were mixed. The annealing was performed  
1276 using the following thermocycler program: 98°C for 3 minutes, 93 cycles of 97°C for 30  
1277 seconds, with -1°C per cycle, holding at 4°C. 10ul of 10x NEBuffer 2, 8ul of 10mM  
1278 dNTP, 41ul H<sub>2</sub>O and 1ul of Klenow fragment (NEB M0210L) were added to the  
1279 annealed DNA, and the sample was incubated at 37°C for 15 minutes. 5ul of 0.5M  
1280 EDTA, pH8.0 was used to stop the reaction. The probes had a concentration of  
1281 ~200nM, and were directly used in the pull-down assays without further purification.

1282 The binding reactions were assembled from protein mixtures and probe mixtures. The  
1283 protein mixture contained 0.1pmol of Hox protein, and between 0.1pmol and 0.5pmol of  
1284 its binding partner in 500ul of dialysis buffer with 0.05% Tween-20. 50ul of 200nM biotin  
1285 labeled probe was added to 200ul of 5x conditioning buffer (50mM Tris-HCl pH7.5,  
1286 250mM NaCl, 5mM MgCl<sub>2</sub>, 2.5mM DTT, 2.5mM EDTA, 100ng/ul BSA, 0.025% Tween-  
1287 20) and 250ul of H<sub>2</sub>O to generate 500ul of the probe mixture. The protein mixture and  
1288 the probe mixture were combined and incubated at room temperature for 30 minutes.

1289 10ul of Dynabeads™ MyOne™ Streptavidin T1 (Thermo Fisher 65601) was used for  
1290 each pull-down reaction. The beads were rinsed once with wash buffer (10mM Tris-HCl,  
1291 pH7.5, 150mM NaCl, 1mM MgCl<sub>2</sub>, 0.5mM EDTA, pH 8.0, 0.5mM DTT, 20ng/ul BSA,  
1292 0.05% Tween-20), and blocked with blocking buffer (1ml wash buffer + 10ul of  
1293 100mg/ml BSA + 20ul of 10mg/ml yeast tRNA) for 10 minutes at room temperature with  
1294 rotation. The binding reaction was then loaded to the blocked beads and the sample  
1295 was rotated at room temperature for 20 minutes. After removing the supernatant, the  
1296 beads were resuspended with 1ml of wash buffer, and the entire sample was  
1297 transferred to a new tube. The supernatant was removed, and the beads were  
1298 resuspended with 50ul of 4x SDS-PAGE sample buffer (with 10% β-mercaptoethanol).  
1299 After heating the sample at 95°C for 5 minutes, the supernatant was loaded on SDS-  
1300 PAGE. Transfer to PVDF membrane was done with standard protocol. 1:1333 mouse  
1301 anti-FLAG M2 antibody (Sigma F1804) was used as the primary antibody, and 1:1333  
1302 HRP conjugated Goat anti-mouse IgG (Jackson ImmunoResearch 115-035-003) was  
1303 used as the secondary antibody. SuperSignal™ West Femto Maximum Sensitivity  
1304 Substrate (Thermo Fisher 34095) was used to visualize the target protein.

1305

1306

1307

1308

1309

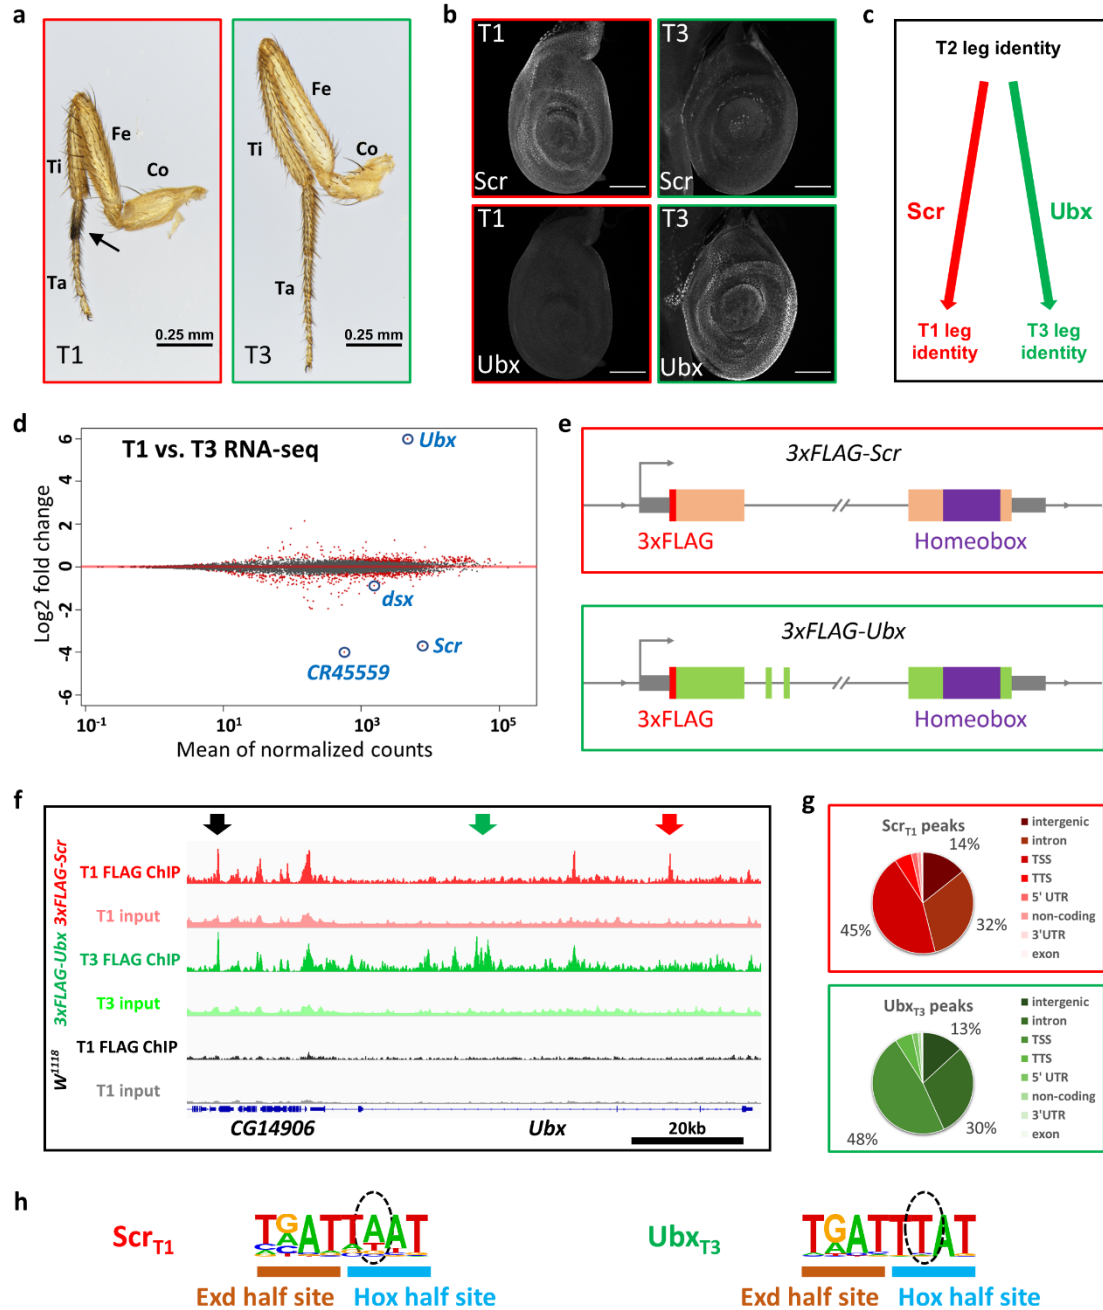

Fig. 1



1311 **Fig. 1. Genome-wide Scr and Ubx ChIP-seq and transcriptomes from T1 and T3**  
1312 **leg discs.**

1313 **a.** Medial view of T1 and T3 legs from adult males. Co: coxa, Fe: femur, Ti: tibia, Ta:  
1314 tarsus, arrow: T1-specific sex combs. T1 legs have relatively large coxa and short  
1315 femurs and, in males, have a tightly packed row of specialized bristles called sex combs  
1316 on the first tarsal segment. In contrast, T3 legs are overall longer than the other legs,  
1317 but with a shorter coxa and longer femur and tibia.

1318 **b.** Co-immunostaining of Scr and Ubx proteins in T1 and T3 leg discs in the wandering  
1319 larva stage. Weak Scr signal in T3 leg disc is from aepithelial cells, not epithelial  
1320 cells<sup>65</sup>. Scale bar: 100  $\mu$ m.

1321 **c.** Summary of the homeotic functions of Scr and Ubx in the specification of T1 and T3  
1322 leg identities, respectively.

1323 **d.** MA plot comparing the T1 and T3 leg disc transcriptomes. Differentially expressed  
1324 genes, defined as FDR<0.01, are labeled red. Several genes investigated in this study  
1325 are indicated. *CR45559* is a lincRNA near the *Scr* locus.

1326 **e.** Schematics of the 3xFLAG tagged *Scr* (see **Methods**) and *Ubx* alleles generated by  
1327 genome targeting<sup>13</sup>. The wide boxes (orange for *Scr* and green for *Ubx*) indicate coding  
1328 regions, and the homeobox is colored purple. The N-terminal 3xFLAG tags are  
1329 highlighted in red. The thin grey box represents the UTRs. The double-slash denotes  
1330 large introns. The direction of transcription is indicated by an arrow at the transcription  
1331 start site (TSS). The schematics are not drawn to scale.

1332 **f.** Genome browser view near the *Ubx* locus showing anti-FLAG ChIP-seq data from T1  
1333 or T3 leg discs dissected from isogenic stocks containing the 3xFLAG-*Scr*, 3xFLAG-  
1334 *Ubx*, or no FLAG-tagged allele (*w<sup>1118</sup>*). Arrows indicate examples of different classes of  
1335 binding: red:  $Scr_{T1} > Ubx_{T3}$ , black:  $Scr_{T1} \approx Ubx_{T3}$ , green:  $Scr_{T1} < Ubx_{T3}$ .

1336 **g.** Pie graphs showing the genomic classification of Scr and Ubx ChIP-seq peaks. TSS:  
1337 transcription start site (promoter), defined as -1 kb to +100 bp from the +1 nucleotide of  
1338 mRNA. TTS: transcription termination site.

1339 **h.** Hox-Exd binding motifs are the most significantly enriched motifs in  $Scr_{T1}$  and  $Ubx_{T3}$   
1340 peaks located in intergenic regions or introns (See **Extended Data Fig. 3a** for complete  
1341 lists). Hox and Exd half sites are indicated. Dashed ovals indicate positions that are  
1342 known to differ for Scr-Exd and Ubx-Exd<sup>8</sup>. Throughout this study, *de novo* motif  
1343 searches were performed on intergenic and intronic binding sites only. We excluded  
1344 other binding sites (mainly TSS/promoter) so that the results are not confounded by  
1345 motifs highly enriched at gene promoters.

1346

1347

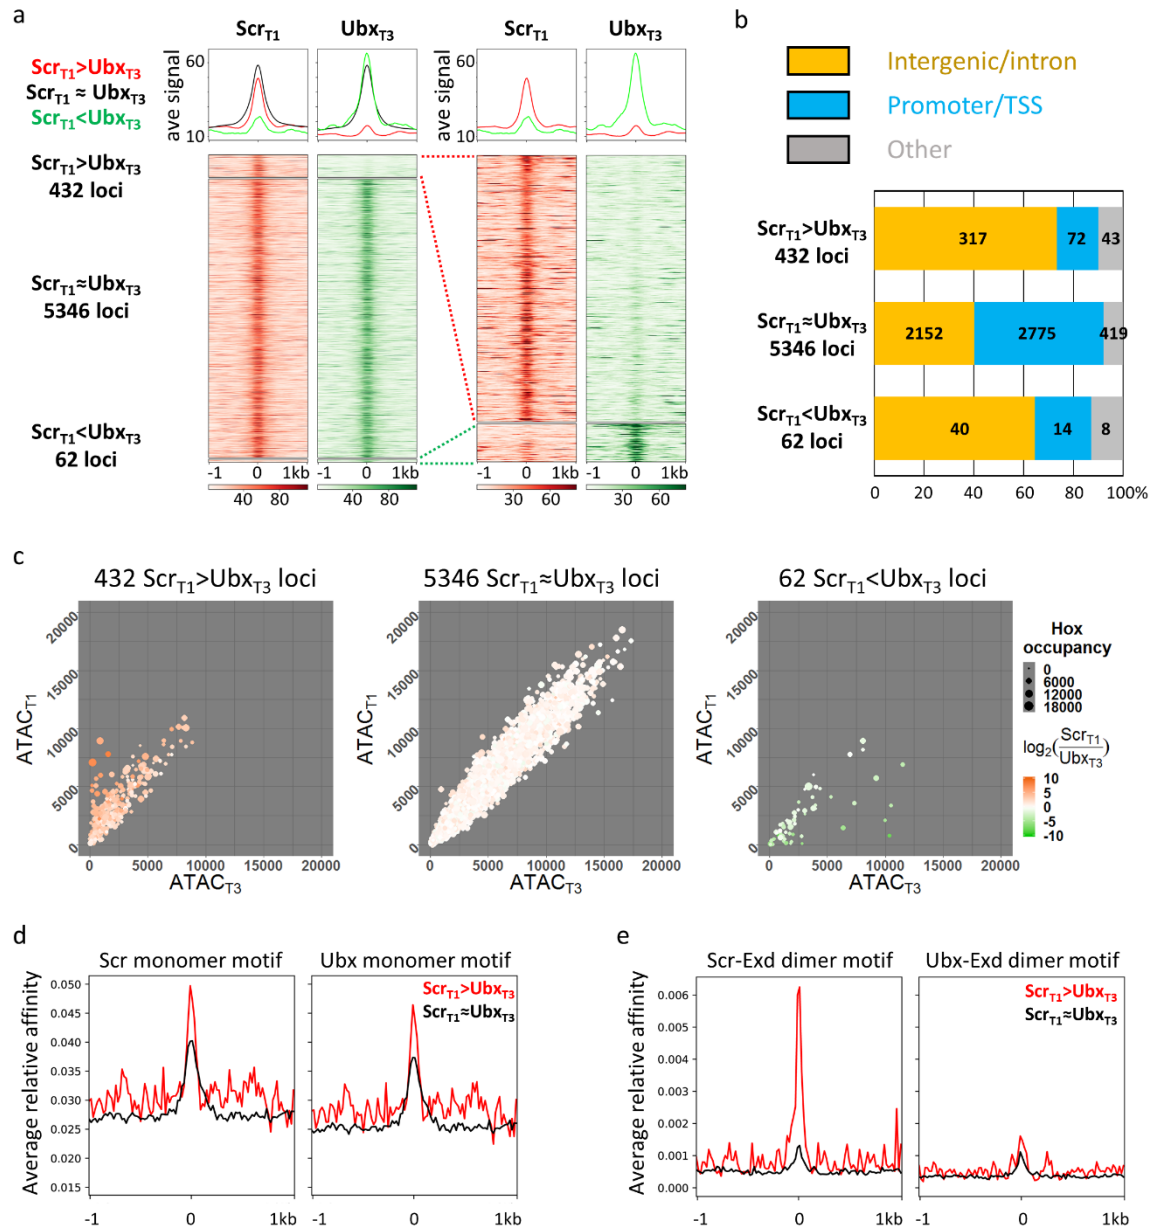

Fig. 2

1349 **Fig. 2. Genome-wide comparison between  $Scr_{T1}$  and  $Ubx_{T3}$  DNA binding profiles.**

1350 **a.** Left: Heatmaps and histograms of  $Scr_{T1}>Ubx_{T3}$ ,  $Scr_{T1}\approx Ubx_{T3}$  and  $Scr_{T1}<Ubx_{T3}$  loci  
1351 plotted for  $Scr_{T1}$  and  $Ubx_{T3}$  ChIPs signals. Right: Blow up of the 432  $Scr_{T1}>Ubx_{T3}$  and 62  
1352  $Scr_{T1}<Ubx_{T3}$  loci. Loci in each of the 3 classes are sorted by the FDR values generated  
1353 by DiffBind in ascending order (see **Methods** for details). The loci are aligned at the  
1354 peak center, with +/-1 kb shown. In all heatmaps in this and other panels, the color  
1355 intensity scores are arbitrary values indicating relative TF occupancy at the target locus.

1356 **b.** Bar graph showing the genome region classification of  $Scr_{T1}>Ubx_{T3}$ ,  $Scr_{T1}\approx Ubx_{T3}$  and  
1357  $Scr_{T1}<Ubx_{T3}$  loci.

1358 **c.** Scatter plots comparing T1 and T3 chromatin accessibility in  $Scr_{T1}>Ubx_{T3}$  (left),  
1359  $Scr_{T1}\approx Ubx_{T3}$  (middle) and  $Scr_{T1}<Ubx_{T3}$  (right) loci. The size of a dot represents the  
1360 average of  $Scr_{T1}$  and  $Ubx_{T3}$  ChIP signals at that locus, and the color indicates the log2  
1361 ratio between  $Scr_{T1}$  and  $Ubx_{T3}$  ChIP-seq signals.

1362 **d** and **e.** Histograms showing relative affinity scores using *NRLB* models for *Scr* and  
1363 *Ubx* monomers (**d**), and *Scr-Exd* and *Ubx-Exd* heterodimers (**e**) in  $Scr_{T1}>Ubx_{T3}$  (red)  
1364 and  $Scr_{T1}\approx Ubx_{T3}$  (black) loci +/-1 kb relative to the peak center.

1365

1366

1367

1368

1369

1370

1371

1372

1373

1374

1375

1376

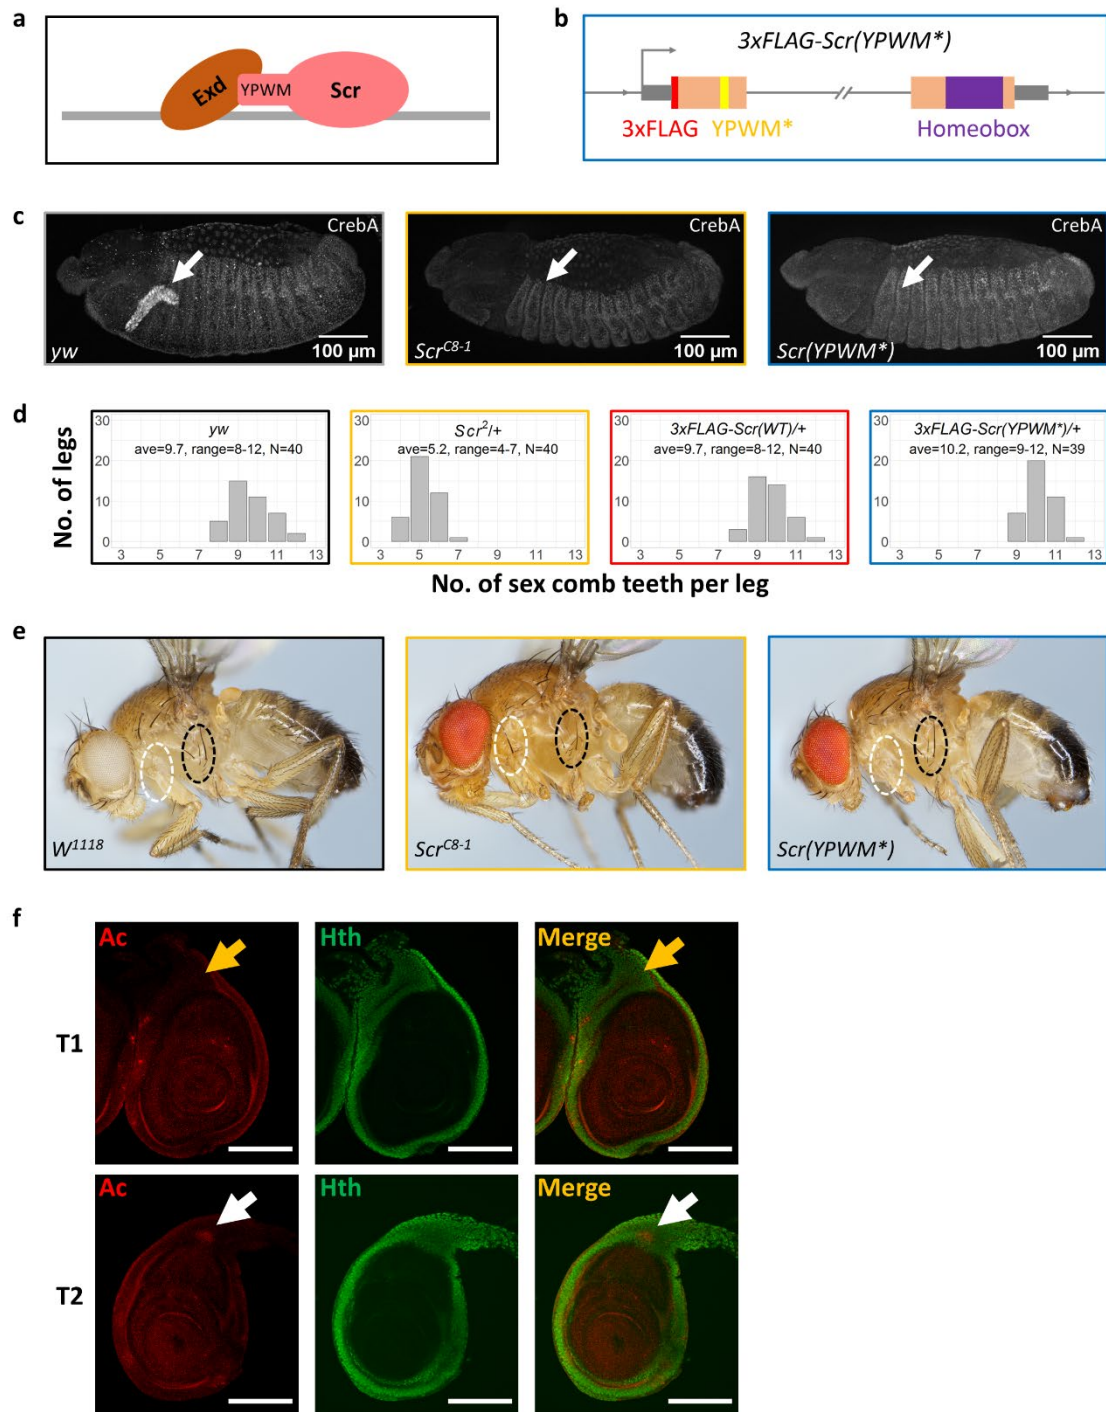

Fig. 3

1378 **Fig. 3. Generation and phenotypic characterization of a YPWM-mutated *Scr* allele.**

1379 **a.** Schematic showing *Scr*-*Exd* interaction mediated by *Scr*'s YPWM motif. The gray bar  
1380 denotes DNA.

1381 **b.** Schematic of the *3xFLAG-Scr*(YPWM\*) allele. The wide orange boxes indicate  
1382 coding regions, and the homeobox is colored purple. The thin grey boxes represent  
1383 UTRs. The *3xFLAG* tag is colored red, and the YPWM->AAAA mutation (YPWM\*) is  
1384 highlighted in yellow. The double-slash denotes the large intron. The direction of  
1385 transcription is indicated by an arrow at the TSS. This schematic is not drawn to scale.

1386 **c.** The activation of *CrebA* in embryonic salivary gland is an *Exd*-dependent *Scr*  
1387 function. Left: *CrebA* is expressed in embryonic salivary gland in wild type embryos.  
1388 Middle: *CrebA* expression in salivary gland is absent in homozygous *Scr* null embryos.  
1389 Right, *CrebA* is also absent in the salivary gland of homozygous *Scr*(YPWM\*) embryos.  
1390 The arrows point to the position of wild type *CrebA* expression domain.

1391 **d.** The number of sex comb teeth in males of various genotypes. The x axis is the  
1392 number of sex comb teeth per leg, and the y axis shows the number of legs. The  
1393 average and the range of sex comb teeth number for each genotype are also shown.

1394 **e.** The suppression of sternopleural bristles (*Sp* bristles) in the T1 segment does not  
1395 require *Scr*'s YPWM motif. Left: wild type. *Sp* bristles are in T2 but not T1 segment.  
1396 Middle: adult with homozygous *Scr* null clones in T1. Consistent with previous  
1397 findings<sup>23</sup>, *Sp* bristles are observed when *Scr* is absent (22 out of 28 adults with the  
1398 correct genotype have *Sp* bristles in T1; the remaining 6 are likely due to less than  
1399 100% efficiency of the *Minute* technique used to induce homozygous clones in adults.  
1400 See **Methods** for details). Right: adult with homozygous *Scr*(YPWM\*) clones in T1  
1401 segment. The *Sp* bristles are not observed (0 out of 16 adults with the correct genotype  
1402 have *Sp* bristles in T1). White and black ovals indicate the equivalent regions of the T1  
1403 and *Sp*-bearing T2 segments, respectively.

1404 **f.** Co-immunostaining of *Ac*, a marker for proneural clusters, and *Hth* proteins in T1 and  
1405 T2 leg discs in the wandering larva stage. White arrows point to the *Ac*+ proneuronal  
1406 clusters for the *Sp* bristles in the *Hth* domain of T2 leg discs, and yellow arrows point to  
1407 the *Ac*- homologous positions in T1 leg discs, where the proneural cluster is suppressed  
1408 by *Scr*. Scale bar: 100  $\mu$ m.

1409

1410

1411

1412

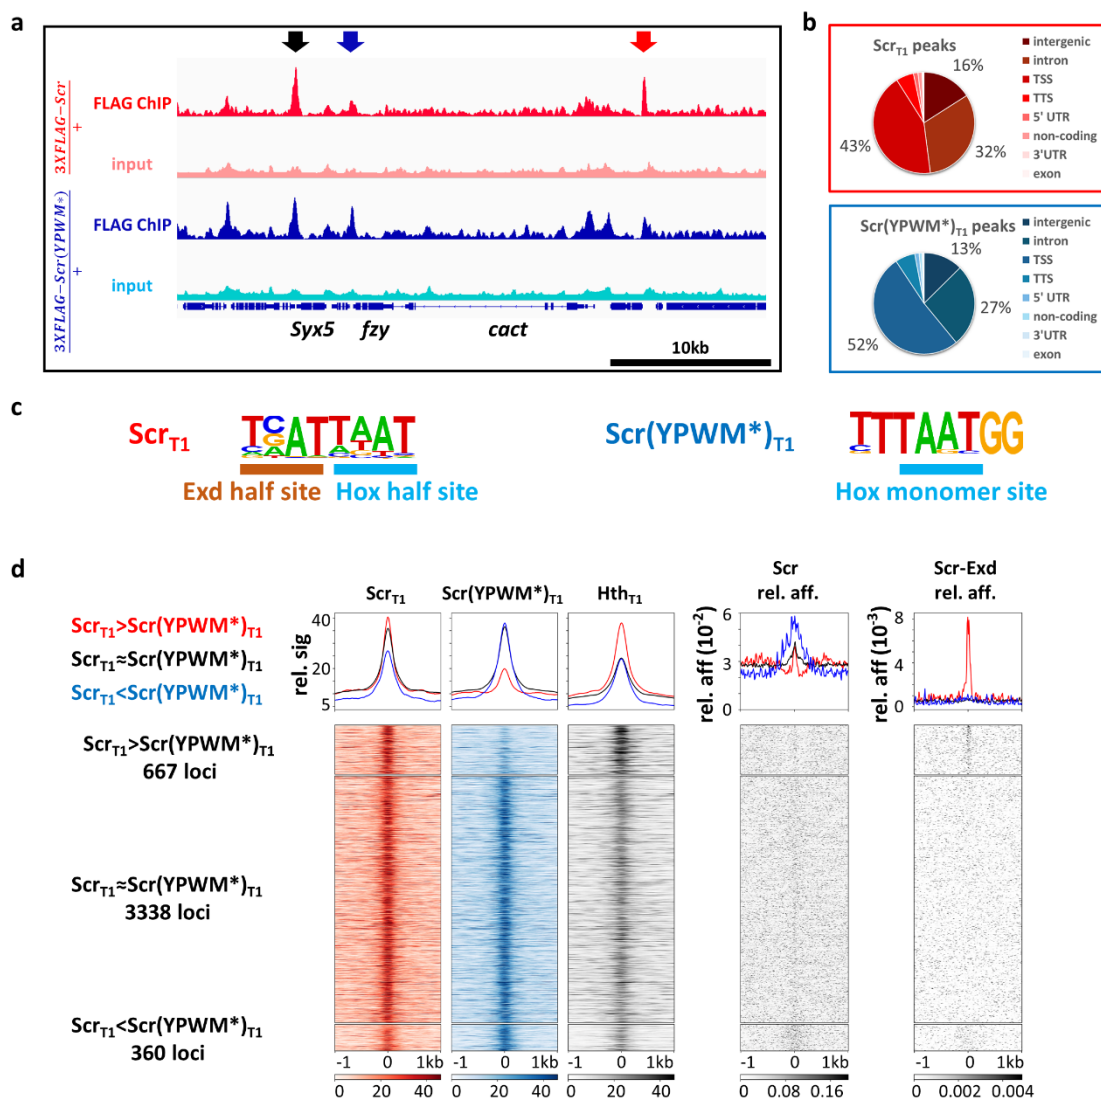

Fig. 4



1414 **Fig. 4. Genome-wide comparison of  $Scr_{T1}$  and  $Scr(YPWM^*)_{T1}$  binding profiles.**

1415 **a.** Genome browser view near the *cact* locus showing anti-FLAG ChIP-seq data from T1  
1416 leg discs dissected from isogenic stocks heterozygous for the *3xFLAG-Scr* or *3xFLAG-*  
1417 *Scr(YPWM^\*)* alleles. Arrows indicate examples of different classes of peaks: red:  
1418  $Scr_{T1} > Scr(YPWM^*)_{T1}$ , black:  $Scr_{T1} \approx Scr(YPWM^*)_{T1}$ , blue:  $Scr_{T1} < Scr(YPWM^*)_{T1}$ .

1419 **b.** Pie graphs showing the genome region classification of  $Scr_{T1}$  and  $Scr(YPWM^*)_{T1}$   
1420 ChIP-seq peaks.

1421 **c.**  $Scr_{T1}$  and  $Scr(YPWM^*)_{T1}$  peaks located in intergenic and intronic regions are  
1422 enriched for Exd-Scr heterodimer and Scr monomer binding sites, respectively. Hox and  
1423 Exd half sites are indicated in the heterodimer motif. See **Extended Data Fig. 3a** for  
1424 complete lists.

1425 **d.** Heatmaps and histograms of  $Scr_{T1} > Scr(YPWM^*)_{T1}$ ,  $Scr_{T1} \approx Scr(YPWM^*)_{T1}$  and  
1426  $Scr_{T1} < Scr(YPWM^*)_{T1}$  loci plotted for  $Scr_{T1}$ ,  $Scr(YPWM^*)_{T1}$ , and  $Hth_{T1}$  ChIP-seq signals.  
1427 The relative affinities from *NRLB* models of Scr monomer and Scr-Exd heterodimer are  
1428 shown to the right. Loci in each of the 3 classes are sorted by the FDR values  
1429 generated by DiffBind in ascending order. Loci are aligned at the peak center, with +/-1  
1430 kb shown.

1431

1432

1433

1434

1435

1436

1437

1438

1439

1440

1441



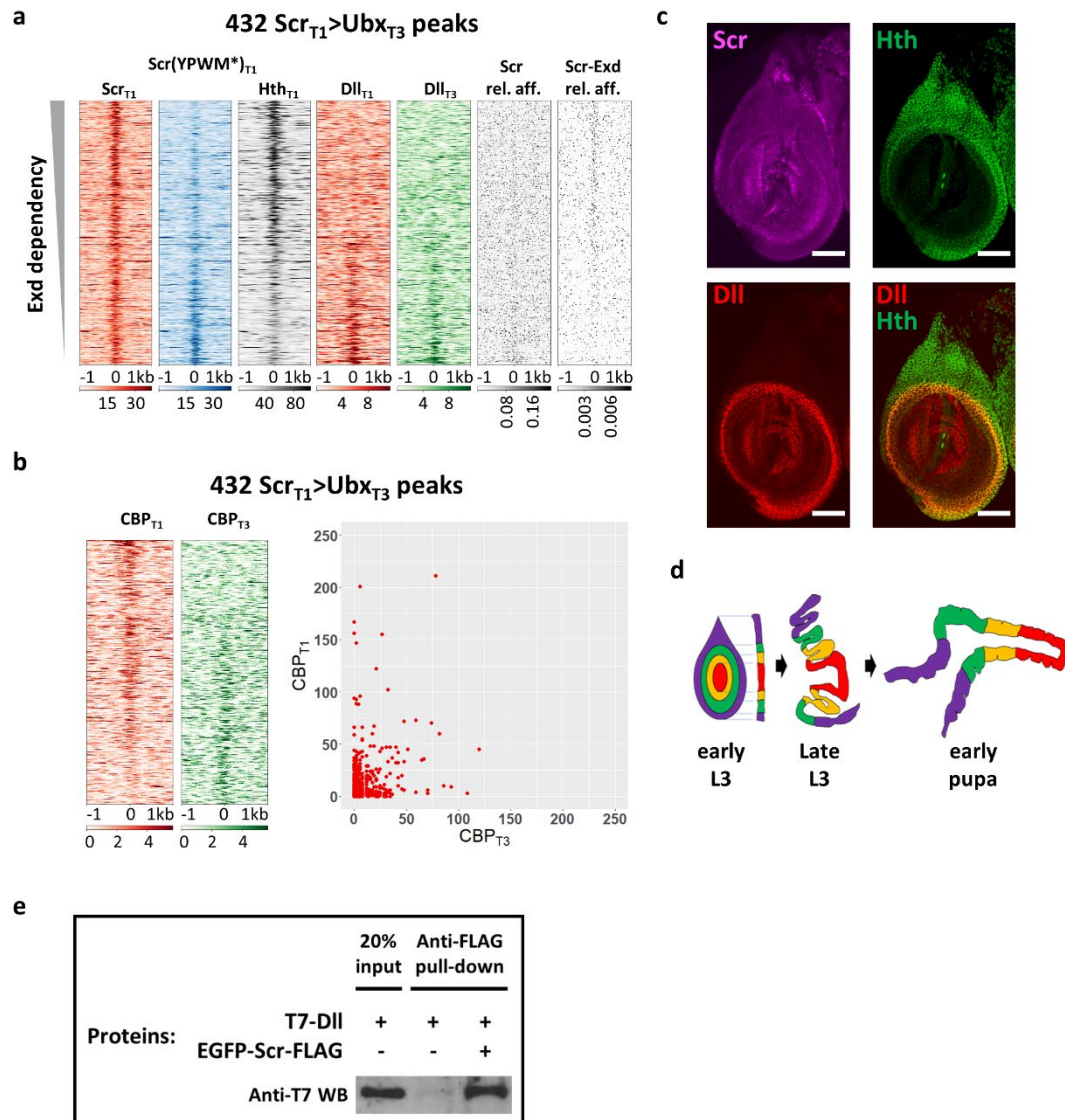

Fig. 5

1443 **Fig. 5. Exd-dependent and -independent Scr<sub>T1</sub>>Ubx<sub>T3</sub> peaks.**

1444 **a.** Heatmaps of the 432 Scr<sub>T1</sub>>Ubx<sub>T3</sub> ChIP-seq peaks sorted by Exd-dependency, based  
1445 on the relative intensities of the Scr<sub>T1</sub> and Scr(YPWM\*)<sub>T1</sub> ChIP-seq signals. Also shown  
1446 are the ChIP-seq signal for Hth in T1 leg disc and the ChIP-seq signals for Dll in T1 and  
1447 T3 leg discs. The relative affinities of Scr monomer (Scr) and Scr-Exd dimers using the  
1448 respective *NRLB* models are also plotted.

1449 **b.** Heatmaps (left) and scatter plot (right) showing CBP occupancy at the 432  
1450 Scr<sub>T1</sub>>Ubx<sub>T3</sub> peaks in T1 and T3 leg discs. The peaks in the heatmaps are sorted  
1451 according to the ratio of T1:T3 CBP occupancy.

1452 **c.** The expression patterns of Scr (magenta), Hth (green) and Dll (red) in T1 leg  
1453 imaginal discs. Scale bar: 50 μm.

1454 **d.** Schematic showing the morphological changes of leg discs during metamorphosis.  
1455 Both top view and lateral cross-section views are shown for early L3 stage, and the  
1456 lateral cross-section view is shown for late L3 (wandering stage) and early pupal stages.

1457 **e.** Co-immunoprecipitation showing physical interaction between Scr and Dll.  
1458 Immunoprecipitation was performed using anti-FLAG antibody and western blot was  
1459 probed with anti-T7 antibody. This experiment was repeated 3 times and one  
1460 representative result is shown.

1461

1462

1463

1464

1465

1466

1467

1468

1469

1470

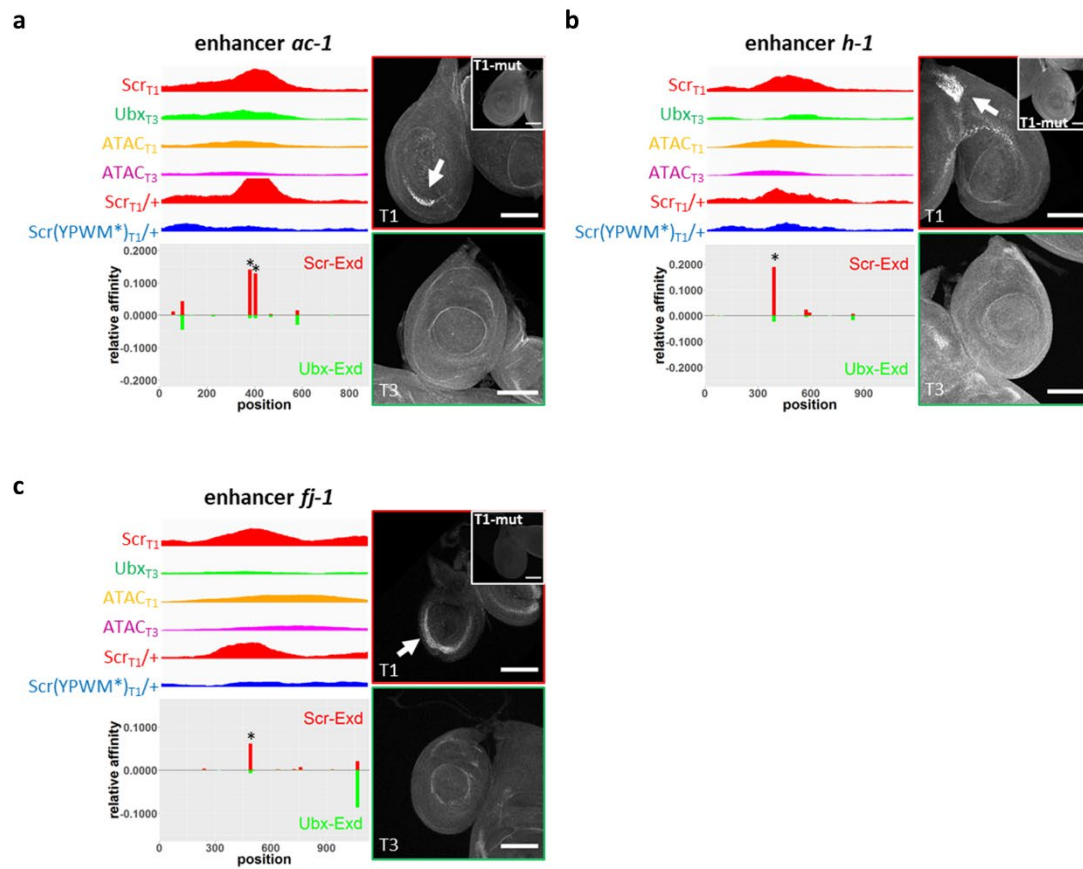

Fig. 6

1472 **Fig. 6. Reporters generated from Exd-dependent  $Scr_{T1}>Ubx_{T3}$  peaks.**

1473 Examples of Exd-dependent  $Scr_{T1}>Ubx_{T3}$  peaks that drive T1>T3 reporter expression  
1474 patterns in leg discs, from loci near *ac* (*ac-1*; **a**), *h* (*h-1*; **b**), and *fj* (*fj-1*; **c**). Each CRM  
1475 characterized in this study was named after a nearby gene. For each fragment covering  
1476 the selected peak, genome browser tracks for  $Scr_{T1}$ ,  $Ubx_{T3}$ ,  $Scr_{T1/+}$  and  
1477  $Scr(YPWM^*)_{T1/+}$  ChIP-seq signals, as well as  $ATAC_{T1}$  and  $ATAC_{T3}$  signals, are shown  
1478 and below them are the *NRLB* relative affinity predictions for Scr-Exd (red bars) and  
1479 Ubx-Exd (green bars). The relative affinity tracks are aligned to the ChIP and ATAC  
1480 tracks. The binding sites chosen for mutagenesis are close to the center of the Scr  
1481 ChIP-seq peak and are indicated with asterisks. Immunostains showing reporter  
1482 expression in T1 and T3 leg discs for the wild type reporters are shown to the right; the  
1483 insets show the expression in T1 discs of reporters where the Scr-Exd binding sites  
1484 were mutated. Scale bar: 100  $\mu$ m.

1485

1486

1487

1488

1489

1490

1491

1492

1493

1494

1495

1496

1497

1498



1500 **Fig. 7. Characterization of Scr-DII DNA binding.**

1501 **a to d.** *NRLB* models generated from gel-free SELEX datasets. **(a)** Scr monomer model.  
1502 **(b)** DII monomer model. **(c)** Scr-Exd dimer model. **(d)** Scr-DII dimer model. Half sites  
1503 are indicated in Scr-Exd **(c)** and Scr-DII **(d)** dimer models.

1504 **e.** Schematic showing the *in vitro* gel-free pull-down assay to assess multi-TF-DNA  
1505 binding.

1506 **f.** Assay validation by testing the binding of Scr to the *fkx250* and *h-1* probes in the  
1507 absence and the presence of Exd. This experiment was repeated 3 times and one  
1508 representative result is shown.

1509 **g.** Sequence alignment of the Scr-DII *NRLB* consensus motif, the *dsx-1*, and the *dpy-1*  
1510 probes.

1511 **h.** Binding of Scr to DNA sequences containing the Scr-DII *NRLB* consensus motif and  
1512 the genomic fragments containing the *dsx-1* and *dpy-1* peaks. Binding was assessed in  
1513 the absence and presence of DII, and in the presence of a negative control protein  
1514 mCherry. The *dsx-1* and *dpy-1* probes are derived from the center of the relevant Hox  
1515 ChIP-seq peak (see **Fig. 8**). All experiments were repeated at least 3 times and one  
1516 representative result is shown.

1517

1518

1519

1520

1521

1522

1523

1524

1525

1526

1527

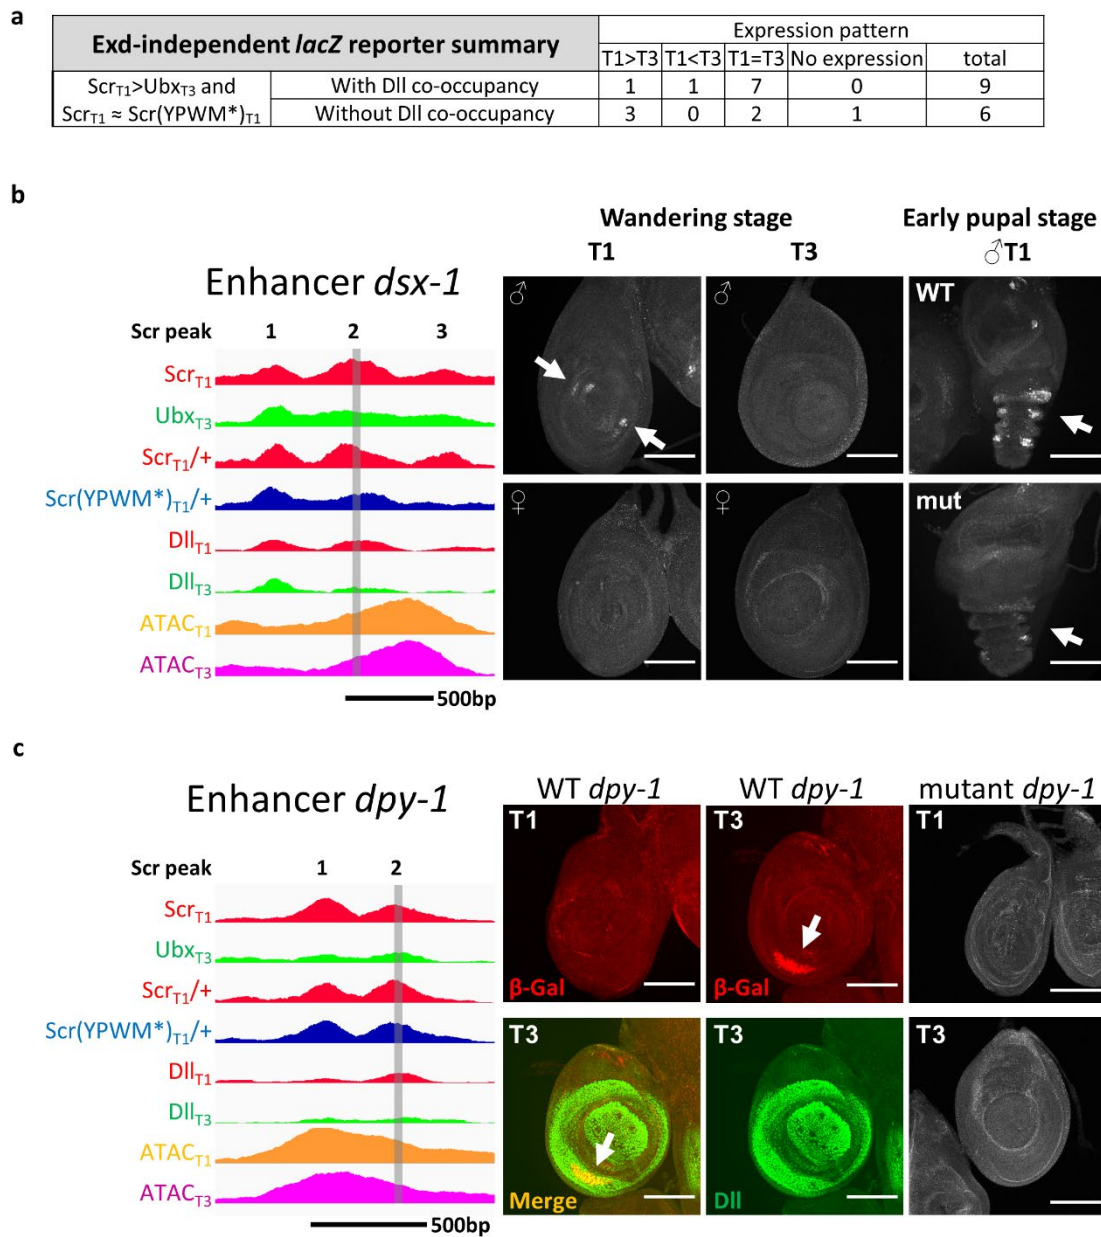

Fig. 8



1529 **Fig. 8. Reporters generated from Exd-independent  $Scr_{T1}>Ubx_{T3}$  peaks.**

1530 **a.** Table summarizing the leg disc expression patterns driven by selected Exd-  
1531 independent  $Scr_{T1}>Ubx_{T3}$  CRMs.

1532 **b** and **c.** Examples of Dll bound Exd-independent  $Scr_{T1}>Ubx_{T3}$  peaks from *dsx* (*dsx-1*;  
1533 **b**) and *dpy* (*dpy-1*; **c**) that drive T1≠T3 expression patterns in leg discs. On the left are  
1534 genome browser tracks for the  $Scr_{T1}$ ,  $Ubx_{T3}$ ,  $Scr_{T1/+}$ ,  $Scr(YPWM^*)_{T1/+}$ ,  $Dll_{T1}$  and  $Dll_{T3}$   
1535 ChIP-seq signals, as well as  $ATAC_{T1}$  and  $ATAC_{T3}$  signals. Hox ChIP-seq peaks within  
1536 the CRMs are numbered. The vertical grey bars denote the Hox ChIP peak center  
1537 region that alters reporter expression when deleted. The *dsx-1* and *dpy-1* probes in **Fig.**  
1538 **7** are also derived from the deleted regions. Panels on the right show T1 and T3 leg  
1539 discs immunostained for reporter gene expression. The T1 and T3 specific expression  
1540 patterns are indicated by arrows. Note that *dsx-1* drives expression only in male T1 leg  
1541 discs, as expected for a *dsx* leg CRM. Scale bar: 100  $\mu$ m.

1542

1543

1544

1545

1546

1547

1548

1549

1550

1551

1552

1553

1554

## 1555 References

- 1556 1. Wagner, G.P. *Homology, Genes, and Evolutionary Innovation*, (Princeton University Press, 2018).  
1557 2. Maeda, R.K. & Karch, F. The bithorax complex of *Drosophila* an exceptional Hox cluster. *Curr Top*  
1558 *Dev Biol* **88**, 1-33 (2009).  
1559 3. Hughes, C.L. & Kaufman, T.C. Hox genes and the evolution of the arthropod body plan. *Evol Dev*  
1560 **4**, 459-99 (2002).  
1561 4. Akam, M. Hox genes and the evolution of diverse body plans. *Philos Trans R Soc Lond B Biol Sci*  
1562 **349**, 313-9 (1995).  
1563 5. Noyes, M.B. *et al.* Analysis of homeodomain specificities allows the family-wide prediction of  
1564 preferred recognition sites. *Cell* **133**, 1277-89 (2008).  
1565 6. Berger, M.F. *et al.* Variation in homeodomain DNA binding revealed by high-resolution analysis  
1566 of sequence preferences. *Cell* **133**, 1266-76 (2008).  
1567 7. Ekker, S.C. *et al.* The degree of variation in DNA sequence recognition among four *Drosophila*  
1568 homeotic proteins. *Embo j* **13**, 3551-60 (1994).  
1569 8. Slattery, M. *et al.* Cofactor binding evokes latent differences in DNA binding specificity between  
1570 Hox proteins. *Cell* **147**, 1270-82 (2011).  
1571 9. Schubiger, G., Schubiger, M. & Sustar, A. The three leg imaginal discs of *Drosophila*: "Vive la  
1572 difference". *Dev Biol* **369**, 76-90 (2012).  
1573 10. Hannah-Alava, A. DEVELOPMENTAL GENETICS OF THE POSTERIOR LEGS IN *DROSOPHILA*  
1574 *MELANOGASTER*. *Genetics* **43**, 878 (1958).  
1575 11. Struhl, G. Genes controlling segmental specification in the *Drosophila* thorax. *Proc Natl Acad Sci*  
1576 *U S A* **79**, 7380-4 (1982).  
1577 12. Lewis, E.B. Genes and Developmental Pathways. *American Zoologist* **3**, 33-56 (1963).  
1578 13. Feng, S., Lu, S., Grueber, W.B. & Mann, R.S. Scarless engineering of the *Drosophila* genome near  
1579 any site-specific integration site. *Genetics* **217**(2021).  
1580 14. Shlyueva, D., Meireles-Filho, A.C.A., Pagani, M. & Stark, A. Genome-Wide Ultrabithorax Binding  
1581 Analysis Reveals Highly Targeted Genomic Loci at Developmental Regulators and a Potential  
1582 Connection to Polycomb-Mediated Regulation. *PLOS ONE* **11**, e0161997 (2016).  
1583 15. Kvon, E.Z. *et al.* Genome-scale functional characterization of *Drosophila* developmental  
1584 enhancers in vivo. *Nature* **512**, 91-5 (2014).  
1585 16. Thurman, R.E. *et al.* The accessible chromatin landscape of the human genome. *Nature* **489**, 75-  
1586 82 (2012).  
1587 17. Buenrostro, J.D., Wu, B., Chang, H.Y. & Greenleaf, W.J. ATAC-seq: A Method for Assaying  
1588 Chromatin Accessibility Genome-Wide. *Current protocols in molecular biology* **109**, 21.29.1-  
1589 21.29.9 (2015).  
1590 18. Rastogi, C. *et al.* Accurate and sensitive quantification of protein-DNA binding affinity. *Proc Natl*  
1591 *Acad Sci U S A* **115**, E3692-e3701 (2018).  
1592 19. Lelli, K.M., Noro, B. & Mann, R.S. Variable motif utilization in homeotic selector (Hox)-cofactor  
1593 complex formation controls specificity. *Proc Natl Acad Sci U S A* **108**, 21122-7 (2011).  
1594 20. Merabet, S. *et al.* A unique Extradenticle recruitment mode in the *Drosophila* Hox protein  
1595 Ultrabithorax. *Proceedings of the National Academy of Sciences* **104**, 16946 (2007).  
1596 21. Andrew, D.J., Horner, M.A., Petitt, M.G., Smolik, S.M. & Scott, M.P. Setting limits on homeotic  
1597 gene function: restraint of Sex combs reduced activity by teashirt and other homeotic genes.  
1598 *Embo j* **13**, 1132-44 (1994).

- 1599 22. Rieckhof, G.E., Casares, F., Ryoo, H.D., Abu-Shaar, M. & Mann, R.S. Nuclear translocation of  
1600 extradenticle requires homothorax, which encodes an extradenticle-related homeodomain  
1601 protein. *Cell* **91**, 171-83 (1997).
- 1602 23. Tsubota, T., Saigo, K. & Kojima, T. Hox genes regulate the same character by different strategies  
1603 in each segment. *Mechanisms of Development* **125**, 894-905 (2008).
- 1604 24. Nègre, N. *et al.* A cis-regulatory map of the Drosophila genome. *Nature* **471**, 527-531 (2011).
- 1605 25. Inbal, A., Halachmi, N., Dibner, C., Frank, D. & Salzberg, A. Genetic evidence for the  
1606 transcriptional-activating function of Homothorax during adult fly development. *Development*  
1607 **128**, 3405-13 (2001).
- 1608 26. Hannah-Alava, A. Morphology and chaetotaxy of the legs of Drosophila melanogaster. *Journal of*  
1609 *Morphology* **103**, 281-310 (1958).
- 1610 27. Taghli-Lamalle, O. *et al.* Direct interaction between Teashirt and Sex combs reduced proteins,  
1611 via Tsh's acidic domain, is essential for specifying the identity of the prothorax in Drosophila.  
1612 *Developmental Biology* **307**, 142-151 (2007).
- 1613 28. Baëza, M. *et al.* Inhibitory activities of short linear motifs underlie Hox interactome specificity in  
1614 vivo. *eLife* **4**, e06034 (2015).
- 1615 29. Robertson, L.K., Bowling, D.B., Mahaffey, J.P., Imiolczyk, B. & Mahaffey, J.W. An interactive  
1616 network of zinc-finger proteins contributes to regionalization of the Drosophila embryo and  
1617 establishes the domains of HOM-C protein function. *Development* **131**, 2781 (2004).
- 1618 30. Gebelein, B., McKay, D.J. & Mann, R.S. Direct integration of Hox and segmentation gene inputs  
1619 during Drosophila development. *Nature* **431**, 653-659 (2004).
- 1620 31. Cohen, S.M., Brönnner, G., Küttner, F., Jürgens, G. & Jäckle, H. Distal-less encodes a  
1621 homoeodomain protein required for limb development in Drosophila. *Nature* **338**, 432-434  
1622 (1989).
- 1623 32. Cohen, S.M. & Jürgens, G. Proximal—distal pattern formation in Drosophila: cell autonomous  
1624 requirement for Distal-less gene activity in limb development. *The EMBO Journal* **8**, 2045-2055  
1625 (1989).
- 1626 33. González-Crespo, S. *et al.* Antagonism between extradenticle function and Hedgehog signalling  
1627 in the developing limb. *Nature* **394**, 196-200 (1998).
- 1628 34. Tanaka, K., Barmina, O., Sanders, L.E., Arbeitman, M.N. & Kopp, A. Evolution of Sex-Specific  
1629 Traits through Changes in HOX-Dependent doublesex Expression. *PLOS Biology* **9**, e1001131  
1630 (2011).
- 1631 35. Rice, G.R. *et al.* Modular tissue-specific regulation of <em>doublesex</em>  
1632 underpins sexually dimorphic development in <em>Drosophila</em>. *Development*  
1633 **146**, dev178285 (2019).
- 1634 36. Ryoo, H.D. & Mann, R.S. The control of trunk Hox specificity and activity by Extradenticle. *Genes*  
1635 *Dev* **13**, 1704-16 (1999).
- 1636 37. Chan, S.K., Jaffe, L., Capovilla, M., Botas, J. & Mann, R.S. The DNA binding specificity of  
1637 Ultrabithorax is modulated by cooperative interactions with extradenticle, another  
1638 homeoprotein. *Cell* **78**, 603-15 (1994).
- 1639 38. van Dijk, M.A. & Murre, C. extradenticle raises the DNA binding specificity of homeotic selector  
1640 gene products. *Cell* **78**, 617-24 (1994).
- 1641 39. Crocker, J. *et al.* Low affinity binding site clusters confer hox specificity and regulatory  
1642 robustness. *Cell* **160**, 191-203 (2015).
- 1643 40. Sánchez-Higuera, C. *et al.* In vivo Hox binding specificity revealed by systematic changes to a  
1644 single cis regulatory module. *Nature Communications* **10**, 3597 (2019).

- 1645 41. Galant, R., Walsh, C.M. & Carroll, S.B. Hox repression of a target gene: extradenticle-  
1646 independent, additive action through multiple monomer binding sites. *Development* **129**, 3115-  
1647 26 (2002).
- 1648 42. Hersh, B.M. & Carroll, S.B. Direct regulation of knot gene expression by Ultrabithorax and the  
1649 evolution of cis-regulatory elements in Drosophila. *Development* **132**, 1567-77 (2005).
- 1650 43. Joshi, R. *et al.* Functional specificity of a Hox protein mediated by the recognition of minor  
1651 groove structure. *Cell* **131**, 530-43 (2007).
- 1652 44. Jolma, A. *et al.* DNA-dependent formation of transcription factor pairs alters their binding  
1653 specificity. *Nature* **527**, 384-8 (2015).
- 1654 45. Joo, S. *et al.* Common ancestry of heterodimerizing TALE homeobox transcription factors across  
1655 Metazoa and Archaeplastida. *BMC Biology* **16**, 136 (2018).
- 1656 46. Holland, P.W.H. Evolution of homeobox genes. *WIREs Developmental Biology* **2**, 31-45 (2013).
- 1657 47. Panganiban, G. *et al.* The origin and evolution of animal appendages. *Proceedings of the*  
1658 *National Academy of Sciences of the United States of America* **94**, 5162-5166 (1997).
- 1659 48. Beumer, K.J., Trautman, J.K., Mukherjee, K. & Carroll, D. Donor DNA Utilization During Gene  
1660 Targeting with Zinc-Finger Nucleases. *G3: Genes/Genomes/Genetics* **3**, 657 (2013).
- 1661 49. Bozas, A., Beumer, K.J., Trautman, J.K. & Carroll, D. Genetic analysis of zinc-finger nuclease-  
1662 induced gene targeting in Drosophila. *Genetics* **182**, 641-51 (2009).
- 1663 50. Estella, C. & Mann, R.S. Non-Redundant Selector and Growth-Promoting Functions of Two Sister  
1664 Genes, buttonhead and Sp1, in Drosophila Leg Development. *PLOS Genetics* **6**, e1001001 (2010).
- 1665 51. Slattery, M. *et al.* Divergent transcriptional regulatory logic at the intersection of tissue growth  
1666 and developmental patterning. *PLoS Genet* **9**, e1003753 (2013).
- 1667 52. Noro, B., Culi, J., McKay, D.J., Zhang, W. & Mann, R.S. Distinct functions of homeodomain-  
1668 containing and homeodomain-less isoforms encoded by homothorax. *Genes Dev* **20**, 1636-50  
1669 (2006).
- 1670 53. Estella, C., McKay, D.J. & Mann, R.S. Molecular Integration of Wingless, Decapentaplegic, and  
1671 Autoregulatory Inputs into Distalless during Drosophila Leg Development. *Developmental Cell*  
1672 **14**, 86-96 (2008).
- 1673 54. Halfon, M.S. *et al.* New fluorescent protein reporters for use with the Drosophila Gal4  
1674 expression system and for vital detection of balancer chromosomes. *Genesis* **34**, 135-8 (2002).
- 1675 55. Andrew, D.J., Baig, A., Bhanot, P., Smolik, S.M. & Henderson, K.D. The Drosophila dCREB-A gene  
1676 is required for dorsal/ventral patterning of the larval cuticle. *Development* **124**, 181-93 (1997).
- 1677 56. Li, X.Y. & Biggin, M.D. Genome-wide in vivo cross-linking of sequence-specific transcription  
1678 factors. *Methods Mol Biol* **809**, 3-26 (2012).
- 1679 57. Sandmann, T., Jakobsen, J.S. & Furlong, E.E. ChIP-on-chip protocol for genome-wide analysis of  
1680 transcription factor binding in Drosophila melanogaster embryos. *Nat Protoc* **1**, 2839-55 (2006).
- 1681 58. Newcomb, S. *et al.* cis-regulatory architecture of a short-range EGFR organizing center in the  
1682 Drosophila melanogaster leg. *PLOS Genetics* **14**, e1007568 (2018).
- 1683 59. Langmead, B., Trapnell, C., Pop, M. & Salzberg, S.L. Ultrafast and memory-efficient alignment of  
1684 short DNA sequences to the human genome. *Genome Biol* **10**, R25 (2009).
- 1685 60. Zhang, Y. *et al.* Model-based Analysis of ChIP-Seq (MACS). *Genome Biology* **9**, R137 (2008).
- 1686 61. Heinz, S. *et al.* Simple combinations of lineage-determining transcription factors prime cis-  
1687 regulatory elements required for macrophage and B cell identities. *Mol Cell* **38**, 576-89 (2010).
- 1688 62. Ross-Innes, C.S. *et al.* Differential oestrogen receptor binding is associated with clinical outcome  
1689 in breast cancer. *Nature* **481**, 389 (2012).
- 1690 63. Robinson, J.T. *et al.* Integrative genomics viewer. *Nature Biotechnology* **29**, 24 (2011).
- 1691 64. Ramírez, F., Diehl, S., Manke, T., Dündar, F. & Grüning, B.A. deepTools: a flexible platform for  
1692 exploring deep-sequencing data. *Nucleic Acids Research* **42**, W187-W191 (2014).

1693 65. Pattatucci, A.M. & Kaufman, T.C. The homeotic gene Sex combs reduced of *Drosophila*  
1694 *melanogaster* is differentially regulated in the embryonic and imaginal stages of development.  
1695 *Genetics* **129**, 443-61 (1991).

1696
